# Supplementary material for: Genomic architecture of endogenous ichnoviruses reveals distinct evolutionary pathways leading to virus domestication in parasitic wasps
Source: PubMed Central journal article supplement (PMC7379367; doi:10.1186/s12915-020-00822-3), 2020-07-24

**Additional file 7.** Dispersion of the viral loci within ichneumonid genomes.

**Table S8.** Distance (in bp) between two segments, a segment and an IVSPER or between two IVSPERs localized in the same scaffold.

| Scaffold ID                         | Segment/IVSPER ID | Position in scaffold | Distance (bp) between segments | Distance (bp) between segment/IVSPER | Distance (bp) between IVSPERs |
|-------------------------------------|-------------------|----------------------|--------------------------------|--------------------------------------|-------------------------------|
| <b><i>Hyposoter didymator</i></b>   |                   |                      |                                |                                      |                               |
| scaffold29771                       | IVSP_U37          | 16848-18686          |                                |                                      |                               |
| scaffold29771                       | Hd46              | 19344-23452          |                                | 659                                  |                               |
| scaffold128213                      | Hd23.1            | 208205-212661        |                                |                                      |                               |
| scaffold128213                      | Hd23.2            | 248624-251985        | 35,964                         |                                      |                               |
| scaffold91                          | Hd_IVSPER-1       | 453857-467876        |                                |                                      |                               |
| scaffold91                          | Hd15              | 469105-474091        |                                | 1,230                                |                               |
| scaffold91                          | Hd33              | 485063-488897        | 10,972                         |                                      |                               |
| scaffold91                          | Hd24              | 535698-540394        | 46,802                         |                                      |                               |
| scaffold91                          | Hd_IVSPER-2       | 541304-567914        |                                | 911                                  |                               |
| scaffold91                          | Hd29              | 572514-576869        |                                | 4,601                                |                               |
| scaffold65                          | Hd37              | 342293-346000        |                                |                                      |                               |
| scaffold65                          | Hd3               | 437082-447095        | 91,083                         |                                      |                               |
| scaffold64                          | Hd14              | 36336-41531          |                                |                                      |                               |
| scaffold64                          | Hd32              | 88702-96617          | 47,172                         |                                      |                               |
| scaffold64                          | Hd42              | 2320523-2323679      | 2,223,907                      |                                      |                               |
| scaffold64                          | Hd21              | 2353107-2357474      | 29,429                         |                                      |                               |
| scaffold377                         | Hd8               | 2186417-2193772      |                                |                                      |                               |
| scaffold377                         | Hd4               | 2459681-2470006      | 265,91                         |                                      |                               |
| scaffold59                          | Hd12              | 674917-680818        |                                |                                      |                               |
| scaffold59                          | Hd16              | 690205-697908        | 9,388                          |                                      |                               |
| scaffold59                          | Hd11              | 2183512-2192701      | 1,485,605                      |                                      |                               |
| scaffold59                          | Hd10              | 2500377-2506883      | 307,677                        |                                      |                               |
| scaffold128243                      | Hd44.2            | 4197203-4202033      |                                |                                      |                               |
| scaffold128243                      | Hd44.1            | 4203985-4206993      | 1,953                          |                                      |                               |
| scaffold351                         | Hd17              | 2329273-2337002      |                                |                                      |                               |
| scaffold351                         | Hd18              | 2681961-2686656      | 344,96                         |                                      |                               |
| scaffold184                         | Hd45.2            | 3564791-3566841      |                                |                                      |                               |
| scaffold184                         | Hd41              | 3768924-3776876      | 202,084                        |                                      |                               |
| scaffold175                         | Hd36              | 3796140-3799877      |                                |                                      |                               |
| scaffold175                         | Hd38              | 3800393-3804056      | 517                            |                                      |                               |
| scaffold175                         | Hd26              | 10942034-10947051    | 7,137,979                      |                                      |                               |
| scaffold127548                      | Hd6               | 5808388-5818848      |                                |                                      |                               |
| scaffold127548                      | Hd2               | 5940296-5954232      | 121,449                        |                                      |                               |
| scaffold127548                      | Hd7               | 6062921-6070986      | 108,690                        |                                      |                               |
| scaffold127548                      | Hd_IVSPER-4       | 6832835-6848646      |                                | 761,850                              |                               |
| scaffold127548                      | Hd_IVSPER-3       | 10761570-10787001    |                                |                                      | 3,912,925                     |
| scaffold127548                      | Hd_IVSPER-5       | 10860001-10861630    |                                |                                      | 73,001                        |
| scaffold127548                      | Hd47              | 12134587-12139089    |                                | 1,272,958                            |                               |
| scaffold127548                      | Hd5               | 12941247-12954959    | 802,159                        |                                      |                               |
| scaffold127548                      | Hd27              | 13338255-13342256    | 383,297                        |                                      |                               |
| <b><i>Campoletis sonorensis</i></b> |                   |                      |                                |                                      |                               |
| scaffold_50                         | Cs_IVSPER-3       | 218627-227236        |                                |                                      |                               |
| scaffold_50                         | CsQ               | 290527-303069        |                                | 63,292                               |                               |
| scaffold_6122                       | Cs_IVSPER-1       | 122689-154282        |                                |                                      |                               |
| scaffold_6122                       | IVSP_U36L         | 234803-235273        |                                | 80,522                               |                               |
| scaffold_14                         | CsG               | 76017-84672          |                                |                                      |                               |

|             |             |                 |         |           |
|-------------|-------------|-----------------|---------|-----------|
| scaffold_14 | CsG2        | 192247-200584   | 107,576 |           |
| scaffold_28 | Cs_IVSPER-2 | 7310-40578      |         |           |
| scaffold_28 | CsC         | 25280-32629     |         | 65,859    |
| scaffold_28 | CsW         | 614005-629811   | 581,377 |           |
| scaffold_16 | CsX6        | 504600-513812   |         |           |
| scaffold_16 | Cs_IVSPER-5 | 2424942-2428691 |         | 1,911,131 |

**Figure S2.** Graphical representation of the mean distance (in Kbp) between viral loci in *H. didymator* and *C. sonorensis* genomes. Data are given between 2 segments, between a segment and an IVSPER, and/or between 2 IVSPERs.

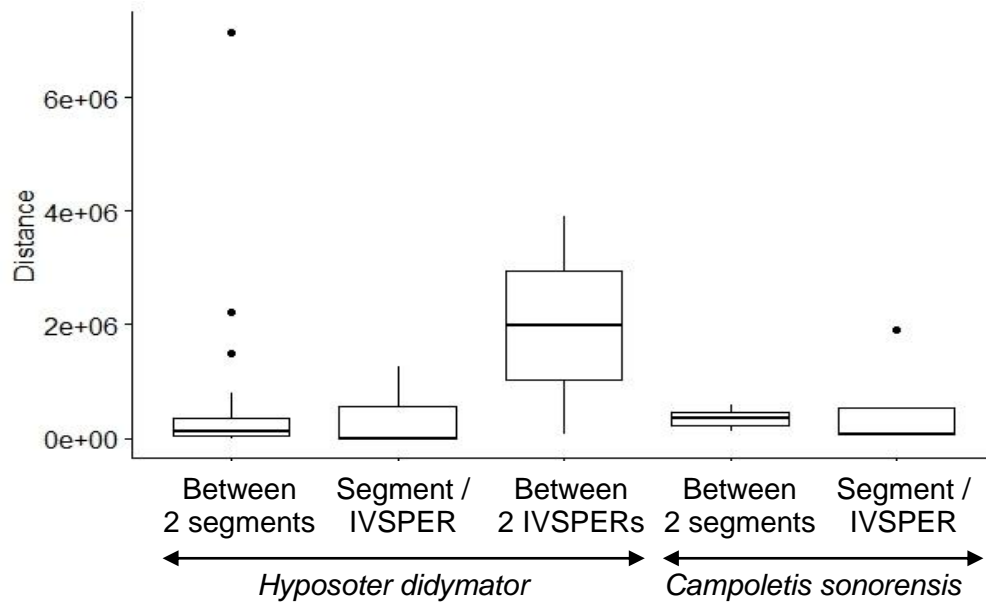

Supplement: 12915_2020_822_MOESM7_ESM.pdf [file 12915_2020_822_MOESM7_ESM.pdf]
