# Supplementary material for: Genomic architecture of endogenous ichnoviruses reveals distinct evolutionary pathways leading to virus domestication in parasitic wasps
Source: PubMed Central journal article supplement (PMC7379367; doi:10.1186/s12915-020-00822-3), 2020-07-24
Supplement: 12915_2020_822_MOESM1_ESM.pdf [file 12915_2020_822_MOESM1_ESM.pdf]

**Additional file 1. Table S1.** Transposable elements (TE) in the genomes of *Hyposoter didymator* and *Campoletis sonorensis*. Total number and percentage are given for each TE class. Detection performed using the REPET pipeline (see Methods). LINE, long interspersed nuclear element; LTR, long terminal repeat; SINE, short interspersed nuclear element.

| Transposable elements (TE) classes | <i>Hyposoter didymator</i> |                          | <i>Campoletis sonorensis</i> |                          |
|------------------------------------|----------------------------|--------------------------|------------------------------|--------------------------|
|                                    | Total number               | Percentage of TE classes | Total number                 | Percentage of TE classes |
| LINE                               | 98                         | 10%                      | 189                          | 20%                      |
| LTR retrotransposons               | 106                        | 11%                      | 193                          | 20%                      |
| SINE retrotransposons              | 33                         | 3%                       | 56                           | 6%                       |
| DNA transposons                    | 299                        | 30%                      | 314                          | 33%                      |
| Others                             | 464                        | 46%                      | 199                          | 21%                      |
| Total                              | 1000                       | /                        | 951                          | /                        |
