# Supplementary material for: Genomic architecture of endogenous ichnoviruses reveals distinct evolutionary pathways leading to virus domestication in parasitic wasps
Source: PubMed Central journal article supplement (PMC7379367; doi:10.1186/s12915-020-00822-3), 2020-07-24
Supplement: 12915_2020_822_MOESM2_ESM.pdf [file 12915_2020_822_MOESM2_ESM.pdf]

**Table S4.** Number of species-specific orthogroups. Number of orthogroups specific to one or groups of species.

| <b>Species or groups</b>                                                                                                                                                    | <b>Number species-specific orthogroups</b> |
|-----------------------------------------------------------------------------------------------------------------------------------------------------------------------------|--------------------------------------------|
| <i>Hyposoter didymator</i>                                                                                                                                                  | 11                                         |
| <i>Campoletis sonorensis</i>                                                                                                                                                | 32                                         |
| <i>Venturia canescens</i>                                                                                                                                                   | 26                                         |
| Ichnovirus-carrying Ichneumonids ( <i>H. didymator</i> , <i>C. sonorensis</i> )                                                                                             | 313                                        |
| Ichneumonids ( <i>H. didymator</i> , <i>C. sonorensis</i> , <i>V. canescens</i> )                                                                                           | 1,728                                      |
| Ichneumonids & Braconids ( <i>H. didymator</i> , <i>C. sonorensis</i> , <i>V. canescens</i> , <i>M. demolitor</i> , <i>F. arisanus</i> , <i>D. alloeum</i> )                | 2,610                                      |
| Parasitic wasps ( <i>H. didymator</i> , <i>C. sonorensis</i> , <i>V. canescens</i> , <i>M. demolitor</i> , <i>F. arisanus</i> , <i>D. alloeum</i> , <i>N. vitripennis</i> ) | 3,240                                      |
| Hymenoptera                                                                                                                                                                 | 5,158                                      |
| Hymenoptera + diptera                                                                                                                                                       | 12,825                                     |
