# Supplementary material for: Genomic architecture of endogenous ichnoviruses reveals distinct evolutionary pathways leading to virus domestication in parasitic wasps
Source: PubMed Central journal article supplement (PMC7379367; doi:10.1186/s12915-020-00822-3), 2020-07-24
Supplement: 12915_2020_822_MOESM3_ESM.pdf [file 12915_2020_822_MOESM3_ESM.pdf]

**Additional file 3. Table S5.** Synteny blocks between pairwise comparisons of multiple parasitoid genomes. Synteny blocks were computed using SynChro [76], a tool based on a simple algorithm that computes Reciprocal Best-Hits (RBH) to reconstruct the backbones of the synteny blocks. Species carrying polydnaviruses are indicated by asterisks. [Ichn.]: Ichneumonid; [Braco.]: Braconid.

| species 1                             | species 2                              | # genes in Species 1 | # genes in Species 2 | RBH   | mean % similarity of RBH genes | # synteny blocks (SB) | mean number of genes in SB | Species 1 nucleotides in SB | Species 2 nucleotides in SB | # Species 1 genes in SB | # Species 2 genes in SB |
|---------------------------------------|----------------------------------------|----------------------|----------------------|-------|--------------------------------|-----------------------|----------------------------|-----------------------------|-----------------------------|-------------------------|-------------------------|
| <i>Campoletis sonorensis*</i> [Ichn.] | <i>Hyposoter didymator*</i> [Ichn.]    | 21,987               | 18,154               | 9,201 | 82.2258                        | 1,112                 | 11.2334                    | 130,986,569                 | 136,689,043                 | 11,816                  | 12,828                  |
| <i>Campoletis sonorensis*</i> [Ichn.] | <i>Diachasma alloeum</i> [Braco.]      | 21,987               | 19,692               | 7,054 | 72.4531                        | 1,581                 | 6.1151                     | 79,457,000                  | 121,585,809                 | 8,101                   | 11,023                  |
| <i>Campoletis sonorensis*</i> [Ichn.] | <i>Fopius arisanus</i> [Braco.]        | 21,987               | 18,906               | 6,963 | 71.7424                        | 1,583                 | 6.2612                     | 78,144,432                  | 64,120,970                  | 7,957                   | 11,583                  |
| <i>Campoletis sonorensis*</i> [Ichn.] | <i>Microplitis demolitor*</i> [Braco.] | 21,987               | 18,586               | 6,889 | 71.3963                        | 1,503                 | 6.4112                     | 79,951,790                  | 87,227,954                  | 8,066                   | 10,937                  |
| <i>Campoletis sonorensis*</i> [Ichn.] | <i>Venturia canescens</i> [Ichn.]      | 21,987               | 23,401               | 9,602 | 81.9265                        | 1,501                 | 7.3997                     | 84,998,388                  | 87,756,926                  | 10,31                   | 11,589                  |
| <i>Diachasma alloeum</i> [Braco.]     | <i>Fopius arisanus</i> [Braco.]        | 19,692               | 18,906               | 10,85 | 84.4038                        | 1,244                 | 13.2826                    | 188,094,018                 | 98,011,380                  | 15,707                  | 17,083                  |
| <i>Diachasma alloeum</i> [Braco.]     | <i>Hyposoter didymator*</i> [Ichn.]    | 19,692               | 18,154               | 8,784 | 71.9646                        | 1,949                 | 5.8489                     | 147,155,684                 | 85,519,660                  | 12,100                  | 10,426                  |
| <i>Diachasma alloeum</i> [Braco.]     | <i>Microplitis demolitor*</i>          | 19,692               | 18,586               | 9,227 | 75.5011                        | 1,723                 | 8.1993                     | 156,017,415                 | 115,880,628                 | 13,263                  | 13,987                  |
| <i>Diachasma alloeum</i> [Braco.]     | <i>Venturia canescens</i> [Ichn.]      | 19,692               | 23,401               | 8,435 | 71.8280                        | 1,960                 | 4.8980                     | 101,537,848                 | 57,440,014                  | 10,261                  | 8,663                   |
| <i>Fopius arisanus</i> [Braco.]       | <i>Hyposoter didymator*</i> [Ichn.]    | 18,906               | 18,154               | 8,622 | 71.5998                        | 2,004                 | 5.9214                     | 78,694,026                  | 88,834,572                  | 12,881                  | 10,551                  |
| <i>Fopius arisanus</i> [Braco.]       | <i>Microplitis demolitor*</i> [Braco.] | 18,906               | 18,586               | 9,151 | 74.8577                        | 1,798                 | 7.8715                     | 82,643,504                  | 117,622,728                 | 14,057                  | 13,906                  |

|                                            |                                         |        |        |       |         |       |        |            |             |        |        |
|--------------------------------------------|-----------------------------------------|--------|--------|-------|---------|-------|--------|------------|-------------|--------|--------|
| <i>Fopius arisanus</i><br>[Braco.]         | <i>Venturia canescens</i><br>[Ichn.]    | 18,906 | 23,401 | 8,203 | 71.5408 | 1,957 | 5.0424 | 53,941,273 | 57,217,953  | 10,812 | 8,631  |
| <i>Hyposoter didymator</i> *<br>[Ichn.]    | <i>Microplitis demolitor</i> * [Braco.] | 18,154 | 18,586 | 8,513 | 72.4243 | 1,844 | 6.2796 | 82,632,725 | 106,502,067 | 10,063 | 12,767 |
| <i>Hyposoter didymator</i> *<br>[Ichn.]    | <i>Venturia canescens</i><br>[Ichn.]    | 18,154 | 23,401 | 11,21 | 82.4090 | 1,695 | 7.2375 | 96,760,707 | 94,022,094  | 11,769 | 12,407 |
| <i>Microplitis demolitor</i> *<br>[Braco.] | <i>Venturia canescens</i><br>[Ichn.]    | 18,586 | 23,401 | 8,163 | 70.9083 | 1,848 | 5.1366 | 72,847,449 | 56,076,459  | 10,217 | 8,494  |
