# Supplementary material for: Genomic architecture of endogenous ichnoviruses reveals distinct evolutionary pathways leading to virus domestication in parasitic wasps
Source: PubMed Central journal article supplement (PMC7379367; doi:10.1186/s12915-020-00822-3), 2020-07-24
Supplement: 12915_2020_822_MOESM4_ESM.pdf [file 12915_2020_822_MOESM4_ESM.pdf]

| Scaffold                          | Scaffold length (nt) | Name of proviral segment /IVSPER | Proviral/IVSPER sequence length (nt) | Position in scaffold | Direct repeats                       | Genes present in viral sequence                                                                                      |
|-----------------------------------|----------------------|----------------------------------|--------------------------------------|----------------------|--------------------------------------|----------------------------------------------------------------------------------------------------------------------|
| <b><i>Hyposoter didymator</i></b> |                      |                                  |                                      |                      |                                      |                                                                                                                      |
| scaffold49647                     | 1586                 | similar to Hd2                   | 1537                                 | 1-1537 (partial)     | not applicable                       | Gly-Pro_P40-like, partial                                                                                            |
| scaffold28498                     | 4159                 | Hd45.1                           | NA                                   | 1-4214 (partial)     | no repeat found at extremities       | U1_Hd45.1, U2_Hd45.1                                                                                                 |
| scaffold82201                     | 6109                 | Hd51                             | 4632                                 | 1077-5708            | Hd51_DRJ1R/L, Hd51_DRJ2R/L           | Rep1_Hd51                                                                                                            |
| scaffold29771                     | 25145                | IVSP_U37                         | 1839                                 | 16848-18686          | not applicable                       | single CDS: U37                                                                                                      |
| scaffold29771                     | 25145                | Hd46                             | 4109                                 | 19344-23452          | Hd46_DRJ1R/L, Hd46_DRJ2R/L           | Vank_Hd46                                                                                                            |
| scaffold1868                      | 202142               | Hd43                             | 4159                                 | 193639-197797        | Hd43_DRJ1R/L, Hd43_DRJ2R/L           | U1_Hd43, Vank1_Hd43                                                                                                  |
| scaffold128213                    | 363895               | Hd23.1                           | 4457                                 | 208205-212661        | Hd23.1_DRJ1R/L                       | Rep1_Hd23.1                                                                                                          |
| scaffold128213                    | 363895               | Hd23.2                           | 3362                                 | 248624-251985        | Hd23.2_DRJ1R/L                       | Rep1_Hd23.2                                                                                                          |
| scaffold91                        | 761975               | Hd_IVSPER-1                      | 14020                                | 453857-467876        | not applicable                       | U1, IVSP1-1, U2, U3, U4, p53-2, U5, IVSP2-1, N-1, U25                                                                |
| scaffold91                        | 761975               | Hd15                             | 4987                                 | 469105-474091        | Hd15_DRJ1R/L                         | N1_Hd15                                                                                                              |
| scaffold91                        | 761975               | Hd33                             | 3835                                 | 485063-488897        | Hd33_DRJ1R/L                         | U1_Hd33, U2_Hd33                                                                                                     |
| scaffold91                        | 761975               | Hd24                             | 4697                                 | 535698-540394        | Hd24_DRJ1R/L                         | Vank1_Hd24, Vinx1_Hd24                                                                                               |
| scaffold91                        | 761975               | Hd_IVSPER-2                      | 26611                                | 541304-567914        | not applicable                       | N-4, U26, IVSP2-2, IVSP4-1, p12-2, U27, U14, p12-3, U13, U12, U11, U10, U9, U8, IVSP3-1, IVSP1-2, U7, U6, N-3        |
| scaffold91                        | 761975               | Hd29                             | 4356                                 | 572514-578869        | Hd29_DRJ1R/L                         | N1_Hd29                                                                                                              |
| scaffold128215                    | 912714               | Hd9                              | 17892                                | 526917-544808        | Hd9_DRJ1R/int/L, Hd9_DRJ2R/L         | U1.1_Hd9, U2_Hd9, U6.1_Hd9, U3.1_Hd9, U4.1_Hd9, U5.1_Hd9, U1.2_Hd9, U6.2_Hd9, U3.2_Hd9, U4.2_Hd9, U5.2_Hd9, U1.3_Hd9 |
| scaffold65                        | 1016704              | Hd37                             | 3708                                 | 342293-346000        | Hd37_DRJ1R/L                         | Rep1_Hd37, U1_Hd37, U2_Hd37                                                                                          |
| scaffold65                        | 1016704              | Hd3                              | 10014                                | 437082-447095        | Hd3_DRJ1R/int/L, Hd3_DRJ2R/int/L     | Cys1_Hd3, Cys2_Hd3, Cys3_Hd3, Cys4_Hd3, Cys5_Hd3                                                                     |
| scaffold90                        | 1092007              | Hd1                              | NA                                   | 1-14771 (partial)    | Hd1_DRJ1R/int, Hd1_DRJ2R/int-1/int-2 | U1_Hd1, U2_Hd1, U3_Hd1, U4_Hd1, U5_Hd1, U6_Hd1                                                                       |
| scaffold264                       | 1259582              | Hd28                             | 4614                                 | 135485-140098        | Hd28_DRJ1R/L                         | Vinx1_Hd28, Vank1_Hd28                                                                                               |
| scaffold128246                    | 1305886              | Hd49                             | 5265                                 | 677866-683130        | Hd49_DRJ1R/L                         | Rep1_Hd49, Rep2_Hd49, Rep3_Hd49                                                                                      |
| scaffold429                       | 1434187              | Hd48                             | 9673                                 | 531833-541505        | Hd48_DRJ1R/L, Hd48_DRJ2R/L           | Rep1_Hd48, Rep2_Hd48                                                                                                 |
| scaffold144                       | 1844462              | Hd20                             | 6864                                 | 1449468-1456331      | Hd20_DRJ1R/L, Hd20_DRJ2R/L           | Cys1_Hd20, Cys2_Hd20                                                                                                 |
| scaffold116                       | 1992701              | Hd35                             | 3710                                 | 473341-477050        | Hd35_DRJ1R/L                         | Rep1_Hd35                                                                                                            |
| scaffold64                        | 2416597              | Hd14                             | 5196                                 | 36336-41531          | Hd14_DRJ1R/L                         | Vinx1_Hd14, U1_Hd14                                                                                                  |
| scaffold64                        | 2416597              | Hd32                             | 7916                                 | 88702-96617          | Hd32_DRJ1R/L, Hd32_DRJ2R/L           | Vinx1_Hd32, Vinx2_Hd32, U1.1_Hd32, U1.2_Hd32                                                                         |
| scaffold64                        | 2416597              | Hd42                             | 3157                                 | 2320523-2323679      | Hd42_DRJ1R/L                         | Rep1_Hd42                                                                                                            |
| scaffold64                        | 2416597              | Hd21                             | 4368                                 | 2353107-2357474      | Hd21_DRJ1R/L                         | Rep1_Hd21, Vinx1_Hd21                                                                                                |
| scaffold377                       | 2592399              | Hd8                              | 7356                                 | 2186417-2193772      | Hd8_DRJ1R/L, Hd8_DRJ2R/L             | U1_Hd8, U2_Hd8, U3_Hd8, U4_Hd8, U5_Hd8                                                                               |
| scaffold377                       | 2592399              | Hd4                              | 10326                                | 2459681-2470006      | Hd4_DRJ1R/int/L                      | Rep1_Hd4, Rep2_Hd4, Rep3_Hd4, Rep4_Hd4, Rep5_Hd4, Rep6_Hd4                                                           |
| scaffold161                       | 2602850              | Hd25                             | 4174                                 | 2449400-2453573      | Hd25_DRJ1R/L                         | PRRP1_Hd25, PRRP2_Hd25, PRRP3_Hd25                                                                                   |
| scaffold127549                    | 2774194              | Hd31-34                          | 4119                                 | 144445-148563        | Hd31-34_DRJ1R/L, Hd31-34_DRJ2R/L     | U1_Hd31-34, U2_Hd31-34                                                                                               |
| scaffold59                        | 2934223              | Hd12                             | 5902                                 | 674917-680818        | Hd12_DRJ1R/L                         | U1_Hd12, Rep1_Hd12, U2_Hd12, Rep2_Hd12                                                                               |
| scaffold59                        | 2934223              | Hd16                             | 7704                                 | 690205-697908        | Hd16_DRJ1R/L, Hd16_DRJ2R/L           | Rep1_Hd16, Rep2_Hd16, Rep3_Hd16, U1_Hd16, U2_Hd16                                                                    |
| scaffold59                        | 2934223              | Hd11                             | 9190                                 | 2183512-2192701      | Hd11_DRJ1R/L, Hd11_DRJ2R/L           | U1_Hd11, Rep1_Hd11, Vank1_Hd11, Vank1p_Hd11, Vank2_Hd11, Vank3_Hd11, Vank4_Hd11, Vank5_Hd11                          |
| scaffold59                        | 2934223              | Hd10                             | 6507                                 | 2500377-2506883      | Hd10_DRJ1R/int/L, Hd10_DRJ2R/L       | Rep1_Hd10, Rep2_Hd10, Rep3_Hd10                                                                                      |
| scaffold198                       | 3327987              | Hd19                             | 4440                                 | 1265454-1269893      | Hd19_DRJ1R/L                         | U1_Hd19                                                                                                              |
| scaffold119                       | 3623981              | Hd22                             | 4178                                 | 698427-702604        | Hd22_DRJ1R/L                         | Rep1_Hd22, U1_Hd22                                                                                                   |
| scaffold127348                    | 3747147              | Hd40                             | 3494                                 | 926528-930021        | Hd40_DRJ1R/L                         | U1_Hd40, U2_Hd40                                                                                                     |
| scaffold357                       | 4004213              | Hd50                             | 5787                                 | 2218373-2224159      | Hd50_DRJ1R/L                         | Vinx1_Hd50, Vinx2_Hd50                                                                                               |
| scaffold128243                    | 5513913              | Hd44.2                           | 4831                                 | 4197203-4202033      | Hd44.2_DRJ1R/L                       | Rep1_Hd44.2, U1_Hd44.2                                                                                               |
| scaffold128243                    | 5513913              | Hd44.1                           | 3009                                 | 4203985-4206993      | Hd44.1_DRJ1R/L                       | U1_Hd44.1                                                                                                            |
| scaffold351                       | 5773413              | Hd18                             | 4696                                 | 2681961-2686656      | Hd18_DRJ1R/L                         | N1_Hd18                                                                                                              |
| scaffold351                       | 5773413              | Hd17                             | 7730                                 | 2329273-2337002      | Hd17_DRJ1R/L, Hd17_DRJ2R/L           | Rep1_Hd17, Rep2_Hd17, Rep3_Hd17, Rep4_Hd17, Rep5_Hd17                                                                |
| scaffold22                        | 5910489              | Hd39                             | 4122                                 | 1002620-1006741      | Hd39_DRJ1R/L, Hd39_DRJ2R/L           | Rep1_Hd39                                                                                                            |

|                                     |          |               |       |                   |                                |                                                                                                                              |
|-------------------------------------|----------|---------------|-------|-------------------|--------------------------------|------------------------------------------------------------------------------------------------------------------------------|
| scaffold128241                      | 6033897  | Hd13          | 5757  | 402487-408243     | Hd13_DRJ1R/L                   | Cys1_Hd13, Cys2_Hd13                                                                                                         |
| scaffold67                          | 6283432  | Hd30          | 4164  | 5867182-5871345   | Hd30_DRJ1R/L, Hd30_DRJ2R/L     | Vinx1_Hd30, U1_Hd30, U2_Hd30, U3_Hd30                                                                                        |
| scaffold184                         | 7628668  | Hd45.2        | 2051  | 3564791-3566841   | no repeat found at extremities | U1_Hd45.2                                                                                                                    |
| scaffold184                         | 7628668  | Hd41          | 7953  | 3768924-3776876   | Hd41_DRJ1R/L, Hd41_DRJ2R/L     | U1_Hd41, U2_Hd41, U3_Hd41                                                                                                    |
| scaffold175                         | 12456768 | Hd36          | 3738  | 3796140-3799877   | Hd36_DRJ1R/L                   | U1_Hd36, Vinx1_Hd36                                                                                                          |
| scaffold175                         | 12456768 | Hd38          | 3664  | 3800393-3804056   | Hd38_DRJ1R/L                   | U1_Hd38, Vinx1_Hd38, U2_Hd38                                                                                                 |
| scaffold175                         | 12456768 | Hd26          | 5018  | 10942034-10947051 | Hd26_DRJ1R/L, Hd26_DRJ2R/L     | PRRP1_Hd26, PRRP2_Hd26, U1_Hd26                                                                                              |
| scaffold127548                      | 15678958 | Hd6           | 10461 | 5808388-5818848   | Hd6_DRJ1R/int/L, Hd6_DRJ2R/L   | U1.1_Hd6, P30_Hd6, Rep1_Hd6, U1.2_Hd6                                                                                        |
| scaffold127548                      | 15678958 | Hd2           | 13937 | 5940296-5954232   | Hd2_DRJ1R/int/L, Hd2_DRJ2R/L   | GlyPro1_Hd2, U1_Hd2, U2_Hd2, GlyPro2_Hd2, SerThr1_Hd2                                                                        |
| scaffold127548                      | 15678958 | Hd7           | 8066  | 6062921-6070986   | Hd7_DRJ1R/L                    | U1_Hd7                                                                                                                       |
| scaffold127548                      | 15678958 | Hd_IVSPER-4   | 15811 | 6832835-6848646   | not applicable                 | U29, U30, U31, U32, U33, U34                                                                                                 |
| scaffold127548                      | 15678958 | Hd_IVSPER-3   | 25432 | 10761570-10787001 | not applicable                 | U15, IVSP3-2, U16, U17, U18, p12-1, U19, IVSP4-2, U20, U21, U22, U23, U28, p53-1, U24, N-2                                   |
| scaffold127548                      | 15678958 | Hd_IVSPER-5   | 1629  | 10860001-10861630 | not applicable                 | U35, U36                                                                                                                     |
| scaffold127548                      | 15678958 | Hd47          | 4503  | 12134587-12139089 | Hd47_DRJ1R/L                   | Rep1_Hd47, Rep2_Hd47                                                                                                         |
| scaffold127548                      | 15678958 | Hd5           | 13713 | 12941247-12954959 | Hd5_DRJ1R/int-1/int-2/L        | Vinx1_Hd5, Vinx2_Hd5, U1_Hd5, Vinx3_Hd5, Vinx4_Hd5, Vinx5_Hd5, Vinx6_Hd5                                                     |
| scaffold127548                      | 15678958 | Hd27          | 4002  | 13338255-13342256 | Hd27_DRJ1R/L                   | U1_Hd27, K19_Hd27                                                                                                            |
| <b><i>Campoletis sonorensis</i></b> |          |               |       |                   |                                |                                                                                                                              |
| scaffold_8749                       | 2269     | rep gene      | NA    | not applicable    | not applicable                 | rep gene 1                                                                                                                   |
| scaffold_8748                       | 2287     | rep gene      | NA    | not applicable    | not applicable                 | rep gene 2                                                                                                                   |
| scaffold_7280                       | 2380     | CsV           | NA    | not applicable    | not applicable                 | cys_CsV, partial                                                                                                             |
| scaffold_8362                       | 5297     | CsX5, partial | >5297 | 1-5297            | no repeat searched             | rep1_CsX5, rep2_CsX5                                                                                                         |
| scaffold_4391                       | 18751    | CsL           | 10024 | 8079-18102        | CsL_DRJ1R/L                    | cys_CsL                                                                                                                      |
| scaffold_5218                       | 32996    | CsP           | 12113 | 15720-27832       | CsP_DRJ1R/L                    | vank4_CsP, vank3_CsP, vank2_CsP, vank1_CsP                                                                                   |
| scaffold_5934                       | 46742    | CsX1          | 17335 | 19391-36725       | CsX1_DRJ1R/int1/int2/L         | vank1_CsX1, vnx1_CsX1, rep1_CsX1, vank2_CsX1, vank3_CsX1, vank4_CsX1, vnx2_CsX1, rep2_CsX1, vank5_CsX1                       |
| scaffold_128                        | 152063   | CsI2          | 9042  | 110016-119057     | CsI2_DRJ1R/L                   | vank1_CsI2, rep_CsI2, vank2_CsI2, vank3_CsI2                                                                                 |
| scaffold_35                         | 217784   | CsX8          | 9999  | 164467-174465     | CsX8_DRJ1R/L                   | HP1_CsX8, cys_CsX8, HP2_CsX8                                                                                                 |
| scaffold_5890                       | 247009   | CsZ           | 15871 | 134147-150017     | CsZ_DRJ1R/L                    | rep1_CsZ, rep2_CsZ, rep3_CsZ, rep4_CsZ, rep5_CsZ, rep6_CsZ, rep7_CsZ                                                         |
| scaffold_110                        | 266287   | CsX2          | 10806 | 248068-258873     | CsX2_DRJ1R/L, CsX2_DRJ2R/L     | vank1_CsX2, vank2_CsX2, vank3_CsX2, vank4_CsX2, rep_CsX2                                                                     |
| scaffold_50                         | 323180   | Cs_IVSPER-3   | 8610  | 218627-227236     | not applicable                 | IVSP4L-2, U4L, p53L-3, U5L, IVSP2L-2, CsN-3                                                                                  |
| scaffold_50                         | 323180   | CsQ           | 12543 | 290527-303069     | CsQ_DRJ1R/int/L                | rep1_CsQ, vinx1_CsQ, vinx2_CsQ, rep2_CsQ, rep3_CsQ, rep4_CsQ                                                                 |
| scaffold_6122                       | 412025   | Cs_IVSPER-1   | 31594 | 122689-154282     | not applicable                 | U15L, IVSP1L-1, U37L-1, U31L-1, U35L, Gf_U27L, U17L, p12L-1, U19L, IVSP4L-1, U22L, U23L, p53L-1, U24L, CsN-1                 |
| scaffold_6122                       | 412025   | IVSP_U36L     | 471   | 234803-235273     | not applicable                 | U36L                                                                                                                         |
| scaffold_60                         | 424299   | CsX3, partial | >7876 | 304794-312669     | no repeat found at extremities | rep1_CsX3, rep2_CsX3, rep3_CsX3, rep4_CsX3                                                                                   |
| scaffold_6095                       | 433103   | CsX7, partial | >6041 | 183042-189082     | no repeat found at extremities | rep1_CsX7, rep2_CsX7, rep3_CsX7                                                                                              |
| scaffold_6070                       | 495171   | CsO1          | 12746 | 168701-181446     | no repeat found at extremities | 4rep_CsO1, 3rep_CsO1                                                                                                         |
| scaffold_116                        | 506917   | CsT           | 23217 | 7789-31005        | CsT_DRJ1R/L, CsT_DRJ2R/L       | no gene found                                                                                                                |
| scaffold_49                         | 562263   | CsB           | 6626  | 22030-28655       | CsB_DRJ1R/L                    | rep_CsB                                                                                                                      |
| scaffold_14                         | 725399   | CsG2          | 8338  | 192247-200584     | CsG2_DRJ1R/L                   | rep1_CsG2, rep2_CsG2, rep3_CsG2, rep4_CsG2                                                                                   |
| scaffold_14                         | 725399   | CsG           | 8656  | 76017-84672       | CsG_DRJ1R/L                    | vnx_CsG                                                                                                                      |
| scaffold_28                         | 729583   | CsC           | 7350  | 25280-32629       | no repeat found at extremities | overlap Cs_IVSPER-2                                                                                                          |
| scaffold_28                         | 729583   | CsW           | 15807 | 614005-629811     | CsW_DRJ1R/int1/int2/L          | cys1_CsW, cys2_CsW, rep1_CsW, cys3_CsW, rep2_CsW, rep3_CsW                                                                   |
| scaffold_28                         | 729583   | Cs_IVSPER-2   | 33269 | 7310-40578        | not applicable                 | p53L-2, U6L, U7L, IVSP1L-2, IVSP3L, U31L-2, U8L, U9L, U16L, U10L, U11L, U12L, U13L, p12L-2, U3L, IVSP2L-1, U26L, CsN-2, U25L |
| scaffold_22                         | 866858   | CsI           | 8779  | 695663-704441     | CsI_DRJ1R/L                    | rep1_CsI, rep2_CsI, rep3_CsI                                                                                                 |
| scaffold_57                         | 1098263  | Cs_IVSPER-4   | 9937  | 383305-393241     | not applicable                 | U30L, U34L, IVSP4L-3                                                                                                         |
| scaffold_131                        | 1180360  | CsF           | 8155  | 808380-816534     | CsF_DRJ1R/L                    | cys_CsF                                                                                                                      |
| scaffold_149                        | 1226226  | CsU           | 15338 | 374074-389411     | CsU_DRJ1R/L                    | cys1_CsU, cys2_CsU, cys3_CsU, cys4_CsU, cys5_CsU                                                                             |
| scaffold_11                         | 1376756  | CsA           | 6368  | 861628-867995     | CsA_DRJ1R/L                    | cys_CsA                                                                                                                      |
| scaffold_17                         | 1497664  | CsE           | 7990  | 1330025-1338014   | CsE_DRJ1R/L                    | rep1_CsE, rep2_CsE, rep3_CsE                                                                                                 |
| scaffold_12                         | 1572921  | IVSP_U37L     | 1863  | 104145-106007     | not applicable                 | U37L-2                                                                                                                       |

|             |         |               |       |                 |                                |                                 |
|-------------|---------|---------------|-------|-----------------|--------------------------------|---------------------------------|
| scaffold_23 | 1817383 | CsM           | 12197 | 1422227-1434423 | CsM_DRJ1R/L                    | N_CsM                           |
| scaffold_5  | 1987530 | CsN           | 10943 | 175169-186111   | CsN_DRJ1R/L                    | N1_CsN, N2_CsN                  |
| scaffold_38 | 2232507 | CsH           | 9050  | 1398066-1407115 | CsH_DRJ1R/L                    | 5rep_CsH                        |
| scaffold_16 | 3063130 | Cs_IVSPER-5   | 3750  | 2424942-2428691 | not applicable                 | IVSP1L-3, U2L, U1L              |
| scaffold_16 | 3063130 | CsX6          | 9213  | 504600-513812   | CsX6_DRJ1R/L                   | rep1_CsX6, rep2_CsX6            |
| scaffold_10 | 3211285 | CsD           | 8168  | 961052-969219   | CsD_DRJ1R/L                    | vnX_CsD                         |
| scaffold_15 | 5987914 | CsJ           | 9484  | 2621922-2631405 | CsJ_DRJ1R/int/L                | rep1_CsJ, rep2_CsJ, rep3_CsJ    |
| scaffold_13 | 6115246 | CsX4, partial | >9181 | 1407384-1416564 | no repeat found at extremities | rep1_CsX4, rep2_CsX4, rep3_CsX4 |
