# Supplementary material for: Genomic architecture of endogenous ichnoviruses reveals distinct evolutionary pathways leading to virus domestication in parasitic wasps
Source: PubMed Central journal article supplement (PMC7379367; doi:10.1186/s12915-020-00822-3), 2020-07-24
Supplement: 12915_2020_822_MOESM9_ESM.pdf [file 12915_2020_822_MOESM9_ESM.pdf]

|                |      |      |                 |              |     |                 |                                                                                                                                                                                                                                                                                                                                                                                                                                                                                                                                                                                                                                                                                                                                                                                                                                                                                                                          |     |  |  |
|----------------|------|------|-----------------|--------------|-----|-----------------|--------------------------------------------------------------------------------------------------------------------------------------------------------------------------------------------------------------------------------------------------------------------------------------------------------------------------------------------------------------------------------------------------------------------------------------------------------------------------------------------------------------------------------------------------------------------------------------------------------------------------------------------------------------------------------------------------------------------------------------------------------------------------------------------------------------------------------------------------------------------------------------------------------------------------|-----|--|--|
| scaffold128241 | Hd13 | 5757 | 402487-408243   | Hd13_DRJ1R   | 673 | 407571-408243   | TCGTAACGGGACGCTGTTAGATGTTATGGTCACCATGGGCTCTGAGGCTTATGTACCACATCGCTTAGACACTTTGGGACTCGGAAAGTTTTTCTCTAC<br>AAGAAAGTGACACCCGCTGTGCAAGTACCAAGTGCATCGCTGAAAGCTAACGATTCATCGAACCCGCTTACGGGAAACACACGCTCACCACGTACGTACT<br>AGAGGTATAAGTACCGGACCGCCATCGAGATACATGGCAAGCGTCACTAACGCTCTCGCGAAGTACGCTACCATGGTGTAGTAGTGTCTATCCGCGCTAC<br>GAAAGTTTTCCCGACGAACCTAGAAAGTCCGCGACATCTCTCGTGGAGCCAAAGCAGCTGCACCCGCTCGTGGAAAAATGTTTTTTCTTAACA<br>ACACACCCCTGTGACACATCGTTTCAATGTACGCGGATAAGCACGATGGTCAACGTCGAATGGTCACTACGCGAGGTTGGTGTGACGACAACTGAATCAC<br>GCTTACTGTACATCGATTACGTTTCAGAAAAAATGCATCCAGCCGAACCTTGAATGTAGATGTACACACGTCAGTTGAAGTGACCGATATGCATTAGCTTC<br>TTTTACCATCCACACGGTCAAGTCAAAATATACACGCTGATCCCTATGATA                                                                                                                                                                                                                             | 92% |  |  |
| scaffold128241 | Hd13 | 5757 | 402487-408243   | Hd13_DRJ1L   | 675 | 402487-403161   | TCGTAAGCGGACAGCCTGTTAGATGTTATGGTCACCATGGGCTCTGAGGCTTATGTACCACATCGCTTAGACACTTTGGGACTCGGAAAGTTTTTCTCTAC<br>AAGAAAGTGACACCCGCTGTGCAAGTACCAAGTGCATCGCTGAAAGCTAACGATTCATCGAACCCGCTTACGGGAAACACACGCTCACCACGTACGTACT<br>AGAGGTATAAATCGGACCGGCAAGCGAAAGTGTGATGGCAAGCGTCACTAACGCTCTCGCGAAGTACGCTACCATGGTGTAGTAGTGTCTATCCGCGCTAAG<br>CAAAGTTTTCCCGACGAACCTAGAAATCGCGCGACATCTCTCGTGAACCAAAGCAGCTGCACCCGCTCGTGGAAAAATGTTTTTTCTTGAACAAAC<br>ACCCTCTCTCACACGCTGTTTCAATGTACGCGGATAAGCACGATGGTCAACGTCGAATGGTCACTACGCGAATGGTGTGACGACAACTGAATCAACG<br>CTTACTGTACATCGATTGCGTATCAGAAAAATGCCTGACCCGAGATTGAAGTGCAGATATATTACAACCTGTCAGATTGTAGTGACCGACATGCATTAGCT<br>TCTTTTACAATCCACACGGTCAAGTCAAAATATTCTCGTGTATCCCTATGATA                                                                                                                                                                                                                       | 92% |  |  |
| scaffold357    | Hd50 | 5787 | 2218373-2224159 | Hd50_DRJ1R   | 902 | 2223258-2224159 | CTTGCTGTGTTGATGAGGTACCATACCCGTCGCCGGGGGAAACACGTAAGCATCCAGCGTGGCGTTGAACCAGCTTCCAAATAGTATCAACGGTTACCG<br>AGGCTACTGTAAAGAACTTTCAGATTTTAAACATGTACGATTAGCGCATGCAATGAAGGATGACTCGACATCAGTTCTTCAACGATCTTTCATGAGATTGCATGG<br>TGCAGTACTCTCATCGATTGAAAGAGCTAGTTATTAGTGTATCTATATGATATGCGGAGTGTACTACGGCCCTTGAACATGAAACTCTAGTACATTCT<br>TCCAATGTGAGGAGTACGAAAGCTTTTTTCAATGAAGCATTAACTGTTCCAAACGCTGATGACGCTGGAGCTGAACGGTATTCTGACAGGACCAACCA<br>ATCCTCGCATAGCATGGCATAAATGCATGACGCTAAGCAGAGAGGTTGCCACTGTCTACACAATGTAAGTATAAGTTCTATCTACGGAACCTTGTCAA<br>CGAGTAAAGTCTTAATAACTCACACATCCAGGCGCACTATGATCATTGACTCTGAGGACTGTGAAGGCTGTGCAAGCTGTGCGAGAGAACTTGAACCC<br>AAATGCAGGGCGGCTCTTAGGAAATCAAGAAAGCCCTTGTAGACTCGTAATGGTTTTTCAAGAAAAAGTCTTTCATGATGAATGCACAAATTTGAATGATG<br>TCATTGCGGTTAAACGTAATATCATTACCGCTATTTTTGCAATGTTTTAAACCGTAATAATCCCACTACATCCATGACAAGCGGATTTGTTATAGAATC<br>CGTTTTCTCTGTTGTTATCATGATCAAAATCAGTAACTTATGATGTGACACATAGCGTTC | 95% |  |  |
| scaffold357    | Hd50 | 5787 | 2218373-2224159 | Hd50_DRJ1L   | 890 | 2218373-2219262 | CTTGCTGTGTTGATGAGGTACCATACCCGTCGCCGGGGGAAACACGTAAGCATCCAGCGTGGCGTTGAACCAGCTTCCAAATAGTATCAACGGTTACCG<br>AGGCTACTGTAAAGAACTTTCAGATTTTAAACATGTACGATTAGCGCATGCAATGAAGGATGACTCGACATCAGTTCTTCAACGATCTTTCATGAGATTGCATGG<br>ATCGATCCGTTGAAAGAGCTAGTTATTAGTGTATCTATATGATATGCGGAGTGTACTACGGCCCTTGAACATGAAACTCTAGTACATTCTTCCAATGGTGA<br>GGTACGAAGCGTTTTTCAATGAAGCAGTAATATGTTCCAAACGCTGATGACGCTGGAGCTGAACGGTATTCTGACAGGACCAACCAATCTTGGCCATA<br>GCATGGCATCAATAATGCATGACGCTAAGCAGAGAGTGGGACTGTCTACACAATGTAAGTATAAGTTCTATCTTGAACCTGTTAAGCAGTAAACAACT<br>CCTAATAACACACATATAGAGGCGCAACTATGATCATTGACTCTGAGGACTGTAAAGCTTGTGCAAGCTGTGCAAGAACTTGAACCAATGCAAGGG<br>GGGCTCAGAAAAATCAAGAAAGCCGCTTGTAGACTCGTAATGGTTTTTCAAGAAAAAGTCTTTCATGATGAATGCACAAATTTGAATGATGCTATCGGCT<br>AAACGTAATACCATACCGCTATTTTTGCAATGTTTTTAAACCAATAAATCTGATACCTACATCCATGACAAGCGGTTATTGTTAGAATCCGCTTTTTCT<br>TGTGCTTATCATGATCAATCAGGACTAATCTATGATGTTACACCCATAGCGTTC       | 95% |  |  |
| scaffold59     | Hd12 | 5902 | 674917-680818   | Hd12_DRJ1R/L | 411 | 680408-680818   | ATAGAGCGTTATCACCAAACTTTTGGCGTACTACTGTTGGGCTTATCTGCAAGTGGTACTTATGATCAAGTTGAGGAAAACTTATCCAGGCGTCTCA<br>TACCCCTGTATGGCTCTCGCTAACTGAACATCCGAGTACACATCTCAGAGGATATCCACACTCAGACCTTACTCAAGACATATGATGGCATATCATA<br>AGCATATTTGATATATAACGAGCTTGCATGCTGACATAACTTCAACAGAGATAAGTAGGAGATCTCCAATGCTATAGGGCTCGAGTGGTTCCT<br>ACAGAGCGGCGTTTTTCTTATCGCTCACTAATAAAGCTGTCTAAGTTTTTTTTGCTCGGCTGCTGCACAAATCCATCCTGCTCGGCGAGAGA<br>ATAGTACGATAATGCGCGCAGCTTTGGGCTACTACTGTTACGGCTTATCTGGAAGTGTACATGATGATCAAGTTAAGAAAACTGATTTAGATGTTCTCAT<br>ATTCCTGTATGGTCTGCTCCGTACCTAAACCTCGCGGTACACGACTACGAAAGAAATGCACACCCAGCGCTTCTCAAGACATATGATGACATATTCGTA<br>AGCATAGTTTGGCATATACAGGAGCTTGCATCCATGTGCACATAACTCCATCAGAGATGAACGGGGAGATCTCCAATGCTATAAGGCCCTAGTGGTTC<br>TACAAGCGGAGGGTTTTAGCTATCGGTTCAACTGCTCCAGCTGCTATAGGTTTTGTTGTTGCTGGTGGCTTTCAGTAATCCCTGCTGCGCAGAGA                                                                                          | 84% |  |  |
| scaffold59     | Hd12 | 5902 | 674917-680818   | Hd12_DRJ1R/L | 412 | 674917-675328   | ATAGTACGATAATGCGCGCAGCTTTGGGCTACTACTGTTACGGCTTATCTGGAAGTGTACATGATGATCAAGTTAAGAAAACTGATTTAGATGTTCTCAT<br>ATTCCTGTATGGTCTGCTCCGTACCTAAACCTCGCGGTACACGACTACGAAAGAAATGCACACCCAGCGCTTCTCAAGACATATGATGACATATTCGTA<br>AGCATAGTTTGGCATATACAGGAGCTTGCATCCATGTGCACATAACTCCATCAGAGATGAACGGGGAGATCTCCAATGCTATAAGGCCCTAGTGGTTC<br>TACAAGCGGAGGGTTTTAGCTATCGGTTCAACTGCTCCAGCTGCTATAGGTTTTGTTGTTGCTGGTGGCTTTCAGTAATCCCTGCTGCGCAGAGA                                                                                                                                                                                                                                                                                                                                                                                                                                                                                                     | 84% |  |  |
| scaffold59     | Hd10 | 6507 | 2500377-2506883 | Hd10_DRJ1R   | 251 | 2500584-2500834 | AAATACGACCAAGGTGGATGCCGTGATGTAGTGGCATAGTGAAGGTGAGCGGCTGTAAGCCCAACAACCTGATACCCCTGGACTACAATCCGTCAC<br>GGCGCTTGGAGCATACCCAGTAACAACGCTGACTTATGTGGTAAAGCAGATTTCACTACAGAGCAAAATACCTGTGCTATCTGATGACACCGATTACAAT<br>CTGTTAGCGTCAGTGTCTACACAATGATGTGGCATACGATAGATG                                                                                                                                                                                                                                                                                                                                                                                                                                                                                                                                                                                                                                                                | 78% |  |  |
| scaffold59     | Hd10 | 6507 | 2500377-2506883 | Hd10_DRJ1int | 234 | 2503546-2503779 | AAAGTTACGACGAAGGTGGATGCCGTGATGTAGTGGCATAGCAAAAGGTGAGCGGCTGCTGGACCACTACTGTGATCCCTGTGATACAATCCGTCAC<br>GGTCTCGAGTATGGTCTCGACACAGCTGCTTCTTCCATGTGACAGCAAAATACCTGTGCTACCTGTGCACAGATTTTCAATCTGGTAGCGTCAGTGT<br>CTACACAATGGTGTGGCATACGACAGGTTG                                                                                                                                                                                                                                                                                                                                                                                                                                                                                                                                                                                                                                                                                 | 84% |  |  |
| scaffold59     | Hd10 | 6507 | 2500377-2506883 | Hd10_DRJ1L   | 288 | 2506596-2506883 | AAATACGACCAAGGTGGATGCCGTGATGTAGTGGCATAGTGAAGGTGAGCGGCTGTAAGCCCAACAACCTGATACCCCTGGACTACAATCCGTCAC<br>GGCGCTTGGAGCATACCCAGTAGCAACGCTGACCTATGGTAAAAACAGATTTCACTTACCAGTGGACTTGGAGGAGTTGTTCTTACTTTTCATCCGAGG<br>CAATACCTGTGCTATCTGATGACACAGATTTACAATCTGTAGCGTCAAGTGCACACAATGATGTGGCATACGATAGGTTG                                                                                                                                                                                                                                                                                                                                                                                                                                                                                                                                                                                                                              | 84% |  |  |
| scaffold59     | Hd10 | 6507 | 2500377-2506883 | Hd10_DRJ2R   | 206 | 2500377-2500582 | CGTGTGCTGGCGGTAGTGACATAGCTTTGACGAGCGCTGATGAGTCAATGATCATCTGCAATGCGGCTTCCAAAACCTGCAAGTGTGCAAGTGGTTCGAAA<br>AGATGTGACAACTACCCCTTCCCTAGATATATCTGTCAATGCGCAAAATAGTGTGAACAAAGTATGATAGTGTCTCAGGTTCTTTTCCGCGAAC<br>CGCTCGGATGCTGTAGTACCGTAGCTTGCAGTTCGATGACGAGTTCATCTGCTGCGGCTTCCAAAACCTGCAAGTGTGCAAGTGGTTCGAAA                                                                                                                                                                                                                                                                                                                                                                                                                                                                                                                                                                                                                  | 87% |  |  |
| scaffold59     | Hd10 | 6507 | 2500377-2506883 | Hd10_DRJ2L   | 205 | 2506390-2506594 | AAAAATGTGACAACTCCGTTCCCTAGATATCTTCTGCTATGCGCAACAGTAAAGTGTGAACAAAGTATGATAGTGTCTCAGGTTCTTTTCCGCGAAC<br>GAACGTTTCCCGATTAAGGAGTTTACGGGAAAAAATAATTTACTGAGTGGTAAATCAACGTTTCAAAATGTTGACCGGCGAGATGCAATCAGCTG<br>CTTCTGCTTGGATTCGATGCTGGAATCTGTGACACGCTGCTGCTCAATGGGAACTGCATTGCTCAGAGTGTATCGACTTATGCTGTGCTGACGAT                                                                                                                                                                                                                                                                                                                                                                                                                                                                                                                                                                                                                  | 84% |  |  |
| scaffold144    | Hd20 | 6864 | 1449468-1456331 | Hd20_DRJ1R   | 215 | 1451905-1452119 | GAACAGTGTCCCCATTGATGGGTTTCCAGGTTAAGTGTACTCTGAGTCCGTTGTCAAATGTTTCAAAATGTTGGACCGGGCGTATGCTCAGCTAC<br>TTCTGATCGGATTTGATGCTGGCGCATATGTGAACACGCTGTTAATGTGAAGTGCATTTGCTCAGAGTCCCATGACCTATTCGCTATGGCTGGCATAAA                                                                                                                                                                                                                                                                                                                                                                                                                                                                                                                                                                                                                                                                                                                   | 84% |  |  |
| scaffold144    | Hd20 | 6864 | 1449468-1456331 | Hd20_DRJ1L   | 214 | 1456118-1456331 | GAACAGTGTCCCCATTGATGGGTTTCCAGGTTAAGTGTACTCTGAGTCCGTTGTCAAATGTTTCAAAATGTTGGACCGGGCGTATGCTCAGCTAC<br>TTCTGATCGGATTTGATGCTGGCGCATATGTGAACACGCTGTTAATGTGAAGTGCATTTGCTCAGAGTCCCATGACCTATTCGCTATGGCTGGCATAAA                                                                                                                                                                                                                                                                                                                                                                                                                                                                                                                                                                                                                                                                                                                   | 87% |  |  |
| scaffold144    | Hd20 | 6864 | 1449468-1456331 | Hd20_DRJ2R   | 308 | 1449468-1449775 | GAATAGACCGTTAAGAAATGACCGGAGCGCAATGAATGGGCTTCTGATGGTGGCTTTCAGGGAGATTAGAGCAATTTCTATAGTACTTTCCACAACCT<br>TGACATAAACAATAAATTTTACATGCACTTAAACCTGCGCTCGCCAGAAAGAGTCTGATCTCCGCTGCAAGCGACAGATATGCAAGTTCCGATT<br>CGACTGCGAAGCGCGGCGCATGACCTAGCGAGATCTTGAACGAAATCACTATGGTGTGACATTTTATACCAGCACTCCACCGAGATTGCAAGTTCCTCA<br>AACCCTGGGCTAGTGTGATATGACCGAAGCGCAATGAACGTCGCTCTTGTGATGCTCCCTTCAAGAAAGTTTGAAGTAAATTTCTATAGTAAATTTTCAAC                                                                                                                                                                                                                                                                                                                                                                                                                                                                                                     | 86% |  |  |
| scaffold144    | Hd20 | 6864 | 1449468-1456331 | Hd20_DRJ2L   | 300 | 1453262-1453561 | GAATAGACCGTTAAGAAATGACCGGAGCGCAATGAACGTCGCTCTTGTGATGCTCCCTTCAAGAAAGTTTGAAGTAAATTTCTATAGTAAATTTTCAAC<br>TTTGAACAATAAATAAATTTTACATGCACTTAAACCTGCTCATGCGCTCGCCAGAAAGAGTCTGATCTGACAGATGTCAGGTTCCGCTTGCAGTCTC<br>AACCGTGGGCTGACCTAGCGAGATCTAGTATGAAACATACTTGAACATACTTACTACTGAAAGCGCAAAATATGCGGCTTCCCA                                                                                                                                                                                                                                                                                                                                                                                                                                                                                                                                                                                                                         | 86% |  |  |
| scaffold377    | Hd8  | 7356 | 2186417-2193772 | Hd8_DRJ1R    | 719 | 2189916-2190634 | AAAGCAACAGCGATTGCAATTTAAATGAAGTAAATGATGCAATGATAAATACACAAGTCAAGTCACTAAGGTTATGGTAGTTTTTTCGAGATACGCA<br>CGCTTTCAAAAGCACTTCACTTGAAGTCCAAAGCGTTGATGCGTAACTAGCGTTTCAAGTTCGACTTGAAGCTGACGAGCTTCAAGCGATGCG<br>GTCACCGGACGTGCAAGTCAAGTGGCTTCAAGCGTTTCAAGCGTTTCAAGCGTTTCAAGCGTTTCAAGCGTTTCAAGCGTTTCAAGCGTTTCAAGCGTTT<br>ATACTACGAGGATGCTGGTGTATATACGGAAGCAGAGCGAGCTCTCACGAATGACTTGTCTGTGTTGACGACGTTTTTTCATATGCAATTT<br>CGTTGGCTCCGTCACACTCAAGTGTATGGCCATACGCGTATGAGATGATGCGCTTGCACAGCTGTCAAAGGTCACCGCTCGAGTACGACATGG<br>TCCAAAAATCGTCTCAATTCATCGACGCTAAATTAAGTGAGCAATGAATCGTTAATATATTCATGCATGATCCAACTGACACTGAAAACTGGTGTG<br>TTTTGAACGATAGCGTAGACTTGCATCATGCTGTGTTTTCCAACTCAGTCCGGCACGACGACGAGAAATGCGTGACCCCTGTGCCCTTTTTTC                                                                                                                                                                                                          | 95% |  |  |

|                |      |      |                 |            |     |                 |                                                                                                                                                                                                                                                                                                                                                                                                                                                                                                                                                                                                                                                                                                                                                                                                                                                                                                                                                                                                    |     |
|----------------|------|------|-----------------|------------|-----|-----------------|----------------------------------------------------------------------------------------------------------------------------------------------------------------------------------------------------------------------------------------------------------------------------------------------------------------------------------------------------------------------------------------------------------------------------------------------------------------------------------------------------------------------------------------------------------------------------------------------------------------------------------------------------------------------------------------------------------------------------------------------------------------------------------------------------------------------------------------------------------------------------------------------------------------------------------------------------------------------------------------------------|-----|
| scaffold377    | Hd8  | 7356 | 2186417-2193772 | Hd8_DRJ1L  | 720 | 2186417-2187136 | AAAGCAACAGCGATTGCATTGGAAATGAAACAAGTACATGCAATGATAAATACACAAGGTCAGTAACTCATAGGGTATTGGGTAGTTCCTGCAATACGCA<br>TCGCTCATAGGACACGCTCCAACCTGGAGCTCCAAGCGTTGAAAAGGATTACTTAGCGTTGCAGTGGAGCTGAAACCGCTGACGAGCGTTGACGCGGATGC<br>GTCTACGGCAGCTGTAGTCCAAGTCAAGTGGTTCGACAAACCGCTTCCAACGCTTCAACGTTGTGAGCGTCAAGTTGAAAGTGGCAGTAAGCTGATGGATA<br>TAACCTAGGAGTGGTGGTATGATACAGGAAGACAGGAGCGCTCAGCAATGACCGCTTGGTGTTCGAGTACGTTTCTATTCTATATGCAATTTG<br>GTGGCTCGCGTCAACACTCTGAAGTATGATGGCCATACGGCTATGAGATGGATGGCGTTGACGACAGCGTCAGAGGTCACGCCCTCGAGTAGCAGCATGG<br>CCAACAATTCGTCTATTTCATGCSAGCGTAATTAATGTCAGTCAATGAATCCCTGTAATATATTCATGCACGTGATCCAAGTCACTGAAAACCTGGTGTG<br>TTGAAGCATTAGGGTAGACTTGTCCATCGTCTGTGCTTTACCAATGATGCATCCGGCACTGACGAGGAATGGTGCACCCCTGCGCTTTTTTC                                                                                                                                                                                                                                                            | 91% |
| scaffold377    | Hd8  | 7356 | 2186417-2193772 | Hd8_DRJ2R  | 292 | 2193481-2193772 | ATAACGCTGTATTGGCGACGTTTACCAAATCCAGAAACCTGGCTTAACTACGTAATACCAGACCCAGTAACCTACTCAAAGCAACAGCGATTGATTCG<br>GAATGAAAATAGTACATGCAATGATAAATATCAAAAGTCAAGTAACTCATAGGGTATTGGGTAGTTTTTCGAAATACGCCAGCCCTTCAAAGCACGCTCAA<br>CTTGGAGCTCCAAAGCGTTGAAAAGCGTTACTTAGCGTTCAGTGGAGGCTGAAAACGCTGACGAGCATTAGATGGATGGCTG                                                                                                                                                                                                                                                                                                                                                                                                                                                                                                                                                                                                                                                                                                  | 91% |
| scaffold377    | Hd8  | 7356 | 2186417-2193772 | Hd8_DRJ2L  | 291 | 2189833-2190123 | ATGACATGTTATGGCGGTTTTTATCAAATCCAGACACATGGCTCAGTATCAGTAATATCAGACTACCGAGGAGTACACTAAAAGCAACAGCGATTGCTT<br>CAAAATGAAGATAAGTACATGCAATGATAAATATCAAAAGTCAAGGTCACGTAACCTCATAGGGTATTGGGTAGTTTTTCGAGATACCGAGCGCTTCAAAGCACGTTCA<br>ACTTGGACGCTCCAAAGCGTTGATAGCGTAACTTAGCGTTCAGCTTGAAGCTGAAAACGCTGACGAGCGTTGACGAGGATGGCT                                                                                                                                                                                                                                                                                                                                                                                                                                                                                                                                                                                                                                                                                       | 85% |
| scaffold59     | Hd16 | 7704 | 690205-697908   | Hd16_DRJ1R | 65  | 694965-695029   | TTGTCATGAGCGTAACTGATTTAACTTGAAGCACTGAAAGAGGAAACGGCTCCACAGTACCTT                                                                                                                                                                                                                                                                                                                                                                                                                                                                                                                                                                                                                                                                                                                                                                                                                                                                                                                                    | 85% |
| scaffold59     | Hd16 | 7704 | 690205-697908   | Hd16_DRJ1L | 65  | 690205-690269   | TTGTCATGAGGAGAACTAAATTTAACTTGTACCAACGCTAAGAGGAAACGGCTCCACAGTACCTT                                                                                                                                                                                                                                                                                                                                                                                                                                                                                                                                                                                                                                                                                                                                                                                                                                                                                                                                  | 85% |
| scaffold59     | Hd16 | 7704 | 690205-697908   | Hd16_DRJ2R | 172 | 697723-697908   | TAGATTATGCAAAAGTGGCAAAGCGGTGATGGCTACGAGATGCGGCTGACCGCTGCATGCAACGATAAGCAGATCATTCAACAAGAAGTATGTTGTTCT<br>AGCGCTTCAAGTGTCTTATGATAAAGTGAAGTGTAGTGTCTGATCATCTCGGCCCCAGCTGGAT                                                                                                                                                                                                                                                                                                                                                                                                                                                                                                                                                                                                                                                                                                                                                                                                                            | 94% |
| scaffold59     | Hd16 | 7704 | 690205-697908   | Hd16_DRJ2L | 172 | 691583-691754   | TACATTATGCAAAAGTGGCAAAGCGGTGATGGCTACGAGATGCGGCTGACCGCTGCATGCAACGATAAGCAGATAGTCTCAACAAGAAGTATGTTGTTT<br>AGAGCTTCAAGCGTCTTCTATGATAAAGTGAAGTGTAGTGTCTGATCATCTCGGCCCCAGCTGGAT                                                                                                                                                                                                                                                                                                                                                                                                                                                                                                                                                                                                                                                                                                                                                                                                                          | 94% |
| scaffold351    | Hd17 | 7730 | 2329273-2337002 | Hd17_DRJ1R | 70  | 2332468-2332537 | GTGTTGCGAGCAATAAGTGGAAACACCTGTATGGCAGCGCTCCACTGACGGCTGCAACACGCTCA                                                                                                                                                                                                                                                                                                                                                                                                                                                                                                                                                                                                                                                                                                                                                                                                                                                                                                                                  | 77% |
| scaffold351    | Hd17 | 7730 | 2329273-2337002 | Hd17_DRJ1L | 73  | 2336930-2337002 | GTGTTGCTTAGGAATAAGTGGAAAGCATCCGCTACTTACACGCTGTACTGAGGCTGACGAGCGCTCA                                                                                                                                                                                                                                                                                                                                                                                                                                                                                                                                                                                                                                                                                                                                                                                                                                                                                                                                | 77% |
| scaffold351    | Hd17 | 7730 | 2329273-2337002 | Hd17_DRJ2R | 161 | 2329273-2329433 | CGTGGACGCTGGAATGTTGACGAGTACGAATTCGCGTGGCAGGACGCTGCAAGTGAAGTGTACGCCCTGCGATGACGAGAAGTATTCGACAGGAGT<br>TGACAACTTTGGCTGCGACTTCGGAACGCGAGATGGCTGATGGTGGCTGTCGGTAAAG                                                                                                                                                                                                                                                                                                                                                                                                                                                                                                                                                                                                                                                                                                                                                                                                                                     | 79% |
| scaffold351    | Hd17 | 7730 | 2329273-2337002 | Hd17_DRJ2L | 161 | 2333675-2333835 | CGTGCATCATGGCTCTCCAGCATATAGACATTCGGCAGGACGAGCGAGAAACAAGTGAAGTGTAGCGCTGCACAGCAAGGAGTATAGACGGCGGT<br>CGACAACCTCGGCTGTGACTTTGAATGCCAGATTGCCTGATGGTAGCTGACCAATAAG                                                                                                                                                                                                                                                                                                                                                                                                                                                                                                                                                                                                                                                                                                                                                                                                                                      | 79% |
| scaffold64     | Hd32 | 7916 | 88702-96617     | Hd32_DRJ1R | 613 | 92195-92807     | AGGCTGACCTCAAGCCGATAACCTACCGCTTATTACCGAGTACCTACGAGAGTCGCTCAAAAACCTGTTATACATAAAGTTTCTACTGCATGCTTAGGGCC<br>TATCTCAAAATCTGCAATGTAGTTGAAAGTGCACCACTCCGCAATGCTTACTTTAGCACCTTATATGTAAGAATCTGCATTTGCGACTGCTGCATTTAC<br>AGTGAAGTGCATGAACGATTCCTCATGGTTAACCACCCACGGTACTTCAATTCATGTTTCCGCTGACGCTGGAAGATGCTGCTGCAACGCTAATCATGGTGA<br>CAAATGCAATAAGCTGGGTGGAATGCTGACTTAAAGATGAATCATACCGTGTGATAGGAATACCTAAATGACACTTTTCTGTTCAATTAAGTCCACCC<br>GCAATAATGTCTTTACCTACATACATAGGATTTGTAATAATACATTTGTCGGCATTTATGCCGATGCATACCTGACAAGAGCGTTGCTGCTGTACGTAA<br>GGGCTCAGCTACATACAAACGAGCGCTCTGGGTTGACTATCTAAATCACTGCTCTCGCCGCAAAATCAAGCGCTAACAGTCT                                                                                                                                                                                                                                                                                                                                                                          | 91% |
| scaffold64     | Hd32 | 7916 | 88702-96617     | Hd32_DRJ1L | 626 | 95992-96617     | AGGCTGACTTCATGCCAATAACCTACTGCTCATTCACTGAGTACCTACGGGAGTCGCTCAAAAACGCAATACATATGGCTTCTACTGCATGCTGATGCTG<br>ACGCCGATCTACAGCCCAAACTGCAATGTAGTTGAAAGTGCATCCATCGCATATGCTTACTTTAGCACCTCGTATGTAAGAATCTGCATTTCAAGTCAAGT<br>CTACTTCGACGTTTCAGTAAAGTGCATGAAGATTTCCCTGGTTAACCACCCACGGTACGCTTTCATGTTTACGCCATGACGTTGGAGATGCTGCTGCGAA<br>CGCTAATCATGGTGACAAAGTGAATGCTGAGCTTAAAGTGAATCATTACGCTTGAAGTGAATCATTACGCTGACAGGAATACCTAAATGACACTTTTCTGTTA<br>TTCAATAGTCCAGCGCAAAATGTTGTTTACCTACATACATAGGATTTGTAATAATACATTTGTCGGCATTTATGCCGATGCATACCTGACAAGAGCG<br>TTGCTGCTGACGTAAGCGCTCAGCTATATCTACAAACGAGCGCTCTGGGTTGACTATCTAAATCACTGCGCTCGCCGCAAAATCAAGCGCTAACAAAT<br>CT                                                                                                                                                                                                                                                                                                                                                  | 91% |
| scaffold64     | Hd32 | 7916 | 88702-96617     | Hd32_DRJ2R | 757 | 88702-89458     | TGAGGAGATGTAAGGAGCTGTGGGCTGCAAAACGAGCGCTGAGGAGGAACTGGAAGTAAAGTGAAGTGAAGTGTGAAAGAAAACCGCTGCAC<br>CGATTATGACGCACTGCCAACTAGCATGTAAGTTTCAACTTGGCTGTGTTGACGCGTTGTTGATTAAGTGGTATGTTGTAAGCTTCTAAAT<br>AAATATTCGACTCCATTCGATTTCTTCTTTAGACACCGTGTGAGCTCGGCAAACTGCTCAGCTCAGTGCATCTTTCCGACAGTAGGACAAACATTT<br>TCTCAACTGTATCTCTTGGAGCAGCACTCATACCGAGGACAGACATACACTTCTATTACTTCAAGAGCTCTCCAAATAGTTGGCAGTCCGAGCTT<br>GTACGGTTCACCCCAAACGATAGCTCAAGAGGTATATGCTTCAACACTTAACTACTTATTTCAACCTATGCTAGGAATAATCATTTGTTTATCTTAC<br>TGTCTTCAAGGCTACTGAGCTAACGAGCTTGGTGGCAACATCAGCTTACCTAAGTACACTATGACACTGCAACACAATCATTTGCAATGCGTGTAGATA<br>GCACTTACTACTACAATAAGTCTAGCTGGTAAAGTGGTATGGAGACTGGTGAAGAGCTGTTATGCAAGCAGCAGCGGAGCGCATGCTGCATTCG<br>TTAAGGTAAGGATGAGCGCT                                                                                                                                                                                                                                                           | 90% |
| scaffold64     | Hd32 | 7916 | 88702-96617     | Hd32_DRJ2L | 750 | 93300-94049     | TGAGGAGATGGTGAAGGAGCTGTGGGCGCAAAACGAGCGCTGAGGAGGAACTGGAAGTAAAGTGAAGTGTGAAAGAAAACCGCTGCAC<br>CAGTTATGACGCACTGCCAACTAGCATGTAAGTTTCAACTTGGCTGTGTTGACGCGTTGTTGATTAAGTGGTATGTTGTAAGCTTCTAAAT<br>AATAATTCGACTCCATTCGATTTCTTCTTTAGACACCGTGTGAGCTCGGCAAACTGCTCAGCTCAGTGCATCTTTCCGACAGTAGGACAAACATTT<br>CTTCAACTGTATCTCTTGGAGCAGCACTCATACCGAGGACAGACATACACTTCTATTACTTCAAGAGCTCTCCAAATAGTTGGCAGTCCGAGCTT<br>TACGGTGCATCCAAACGATAGCTCAAGAGGTATATGCTTCAACACTTAACTACTTATTTCAACCTATGCTAGGAATAATCATTTGTTTATCTTACT<br>GCTATCTCAAGGCTACTGAGCTAACGAGCTTGGTGGCAACATCAGCTTACCTAAGTACACTATGACACTGCAACACAATCATTTGCAATGCGTGTAGATA<br>GCACTTACTACTACAATAAGTCTAGCTGGTAAAGTGGTATGGAGACTGGTGAAGAGCTGTTATGCAAGCAGCAGCGGAGCGCATGCTGCATTCG<br>TTAAGGTAAGGATGAGCGCT                                                                                                                                                                                                                                                               | 90% |
| scaffold184    | Hd41 | 7953 | 3768924-3776876 | Hd41_DRJ1R | 551 | 3768924-3769474 | AAGTAACTATAGGATGTTGGCAATCTCTGCATAAGCGCGGCTTTTATTTCAAAACAGCAGTACTGCTGCAATTTACAGTGAAGGCGGTG<br>GAAAACCTGTGTGCGGCTGGTATGCCGGTGTATATACTAAGTTTCCCAACACCGCAGTAAACCAAAAACCTCACTTAGACACAACATATAGAACGACCGA<br>ACGTTTTCTCACTAAGTGCAGTAAAGTGAATGCTGCATGTAAGTTCGCACTGGCTGTGTTGACGCGTTGTTGATTAAGTGGTATGTTGTAAGCTTCTAAAT<br>TATCACCCTGAGAACTGGTACTAAAGACTTTGAAAAGCAACGCTGAGAGAGCAGCGAGGATTTTGAAGCAACAAAGGTAAAACCGCTGCGGTGAGGAT<br>GCATGGAGACTCGCAAACTGATCACAACGAGCTTACCTTTCAACACTGCGAAAATGTGATGAGCTGTCAGTGTGACTTCTTCCAGCCGCGGAGAGT<br>CCCTTTGGTAGAAAAATATGCACGCTTTCTGT                                                                                                                                                                                                                                                                                                                                                                                                                                           | 85% |
| scaffold184    | Hd41 | 7953 | 3768924-3776876 | Hd41_DRJ1L | 540 | 3771924-3772463 | AAGTAACTATAGGATGTTAGGCAATCTCTGAATGAGCGCGGCTTTTATTTCAAAACAAATATGCTACCGTATTTATAGCGACACTAAGAGCGTGGGAAAC<br>TTGTTGCGGCTGGTATGCCGGTGTATCCAAAGTTTCCCGCAGCAGCAGTAAACCAAAAACCTCACTTGGACACAACATATAGGAACACACCTAACGTTTT<br>CTCACTAAGTGCAGCTAAGGTAAGTGTCCAGGTAATGCTTCCGATCGCTGTCAAGCACCATTACTCAGCTCAGCTTCCGATGATATGTTATCAAC<br>CGTGAAGACTGTTACTGAAGACTATTCGAAGCGGTGTGAGAGCAGCGGAGATTTTCAAGATGAAACAGGAGTATGCTGCTGTGATGATGATAGAG<br>CAACTTTGCAACTGATCACAAGCGACTCCAGCTGTAAGGCTGTAAGAAATATAAATGAGTTGCTGCTACTTAAATTCATATCGGCGAGTGTCTAGGTAG<br>GAAAATGAGGATGAGCGCT                                                                                                                                                                                                                                                                                                                                                                                                                                                   | 81% |
| scaffold184    | Hd41 | 7953 | 3768924-3776876 | Hd41_DRJ2R | 305 | 3771631-3771935 | AACCTGTAGCATAGTAGACTCAAATAACCAATCATGCTGAGAGATCTATGATCCGGTGGTGGGCTAGTATCTGAGAAGCTAAACAAAGCTCGTGCAGT<br>GAGGGGAAACATCATGCCGCTCAGCAGCGCAACCATGTGATCAGTATGATAAGCTAGTCAAGGATGTAAGCAACGATATACATGTTACTTGTCCCAACGATTA<br>CCAGAAACCGGTTAGTTCTACAGCAACCAAAGAAATTTGCTTCCGATCCAAAGTAGTCTATCCACCTATAGCTTTTCAAGCTGAAGTGAATCACTTA<br>AACCTGTAGCATAGTGTAGACTCGAATAAGCAATCATGCTAAAGGATATATGACCCGGTGGTGGGCTAGTATCTGGAAGAACTCACAAGCTCGGAGCA<br>TGAGGAAACCATCTGCGCTCAGCAGCAACGAGCAAGTACAGTAAACAGCTGCTCAGACATGACAGGATGACAGGATGATGATGCTATTTGGCTACCAACCG<br>TTACAGCAGCCGCAAGCTTCCGCAACAAACAAACATTTGCTTCCGACTTCAAGTGGCTTATCCACGATAGTATCACAAGTAAAGTATAAGTTA<br>GATTCGATTCCTTCCGACTGTTTACTTCTGCTGCTGCTTACTGACACAGCAGCAACCAACCCATTGGGTATATTTGGTGAACGAGCGGCTGATTT<br>ACATCGAAATCTCTGGCAGCAATTACGACCGTTTATGGTAAAAGGATGCAAGTGAAGAGCGAAAGTATCAAAAATAAAGATGAAGGATTTATCGATTTG<br>TTGCCCTGACCAATTTCTCAACGTTCAAATCCCTCTTCTAGTCAAGTCTTTTATCGTGTAAACGAAACATCGCTTGGACAGCTGAATTTGTTGTTGCTG<br>CTTTGGTATATCTTTTTTGGAGCTCTCGGCTGATACCTGAGCC | 81% |
| scaffold127548 | Hd7  | 8066 | 6062921-6070986 | Hd7_DRJ1R  | 362 | 6062921-6063280 | GATTCGATTCCTTCCGACTGTTTACTTCTGCTGCTGCTTACTGACACAGCAGCAACCAACCCATTGGGTATATTTGGTGAACGAGCGGCTGATTT<br>ACATCGAAATCTCTGGCAGCAATTACGACCGTTTATGGTAAAAGGATGCAAGTGAAGAGCGAAAGTATCAAAAATAAAGATGAAGGATTTATCGATTTG<br>TTGCCCTGACCAATTTCTCAACGTTCAAATCCCTCTTCTAGTCAAGTCTTTTATCGTGTAAACGAAACATCGCTTGGACAGCTGAATTTGTTGTTGCTG<br>CTTTGGTATATCTTTTTTGGAGCTCTCGGCTGATACCTGAGCC                                                                                                                                                                                                                                                                                                                                                                                                                                                                                                                                                                                                                                       | 79% |
| scaffold127548 | Hd7  | 8066 | 6062921-6070986 | Hd7_DRJ1L  | 366 | 6070623-6070986 | GATTCGATTCCTTCCGACTGTTTACTTCTGCTGCTGCTTACTGACACAGCAGCAACCAACCCATTGGGAGGTTATTTGGTGAACGAGCGGCTGATTT<br>CACTTACACGAAATCTCTGGCAGCAATTACGACCGTTTATGGTAAAAGGATGCAAGTGAAGAGCGAAAGTATCAAAAATAAAGATGAAGGATTTATCGATTTG<br>CGATTTGCTCACTCACAATAATCTTCCAGCTTCCAGCCGCTTCTTCAATCAGTCTTTTATCGTGTAAACGAAACATCGCTTGGACAGCTGAATTTGTTGCTG<br>TAATCTTTATACATGCTTTTTTGGAGCTCTCGGCTGATACCTGAGCC                                                                                                                                                                                                                                                                                                                                                                                                                                                                                                                                                                                                                          | 79% |





|              |      |      |                 |             |     |                 |                                                                                                                                                                                                                                                                                                                                                                                                                                                                                                                                                                                                                                                                                                                         |     |
|--------------|------|------|-----------------|-------------|-----|-----------------|-------------------------------------------------------------------------------------------------------------------------------------------------------------------------------------------------------------------------------------------------------------------------------------------------------------------------------------------------------------------------------------------------------------------------------------------------------------------------------------------------------------------------------------------------------------------------------------------------------------------------------------------------------------------------------------------------------------------------|-----|
| scaffold_10  | CsD  | 8168 | 961052-969219   | CsD_DRJ1L   | 711 | 961052-961762   | GAAAAGTTTTGGGAGAGTTGGCTGTTGAAGTTGCGAGTTGAACTTCAGTTTCTCCCATGTCAAACCTACGTTGAATGAAATGAGTTGAGCTTAGACGACGCTTCGACGAAACGGCCAGAGCTCAGAGAAGATGTCAACGAGCATCCAGCAGCAGAGTCGAGTGAGCCTAGCCAGCAAGGTCGTGCCGTACGAGATGAGTCTGCGAAAAGCATAGGACGGCAGATAGTACGTTATACCCCGTTGACGGATGGCAATGTCTGTAAGAAGTGAAGAGCTTCATGTTGAGCAAGTGGTGATCCCGTCGATTGACCCGAGCATCACTCGCATGATAGCCTCTGCTAGTGTGACTTCTAGAAGAACCCAGCCTGCTTCTCAGCAACAATTTACAGGTTTGGCAGTGTGTACACCACAACAGGCAACAATAACTGCATTTTGACATACGACAGGTTTGTATCGTTTCAITGCAACGTAAGTTTCAATCCCAAAAGTGGCTCGACCTGTGAATACATGGATAGCGTGACTAGCGAGTACCTTTTATACGACACCAAACTGCGTCAACAGCGTCTACCGTCAAGTCCCAATATGGSATAGSAGCATGAGAGTTATCTGGCTCGCATATACCGCTTTTCACTGTCCCCGCCAGGTACACGGCCAGATAAACTAACAAATGTGCTCACGTACAGATTCAAAGTAGG | 98% |
| scaffold_10  | CsD  | 8168 | 961052-969219   | CsD_DRJ1R   | 711 | 968509-969219   | GAAAAGTTTTGGGAGAGTTGGCTGTTGAAGTTGCGAGTTGAACTTCAGTTTATCCCATGTCAAACCTACGTTGAATGAAATGAGTTGAGCTTAGACGACGCTTCGACGAAACGGCCAGAGCTCAGAGAAGATGTCAACGAGCATCCAGCAGCAGAGTCGAGTGAACTAGCCACAAGGTCGTGCCGTACGAGATGAGTCTGCGAAAAGCATAGGACGGCAGATAGTACGTTATACCCCGTTGACGGATGGCAATGTCTGTAAGAAGTGAAGAGCTTCATGTTGAGCAAGTGGTGATCCCGTCGATTGAAACCGAGCATCACTCGCATGATAGCCTCTGCTAGTGTGACTTCTAGAAGAACCCAGCCTGCTTCTCAGCAACAATTTACAGGTTTGGCAGTGTGTACACCACAACAGGCAACAATAACTGCATTTTGACATACGACAGGTTTGTATCGTTTCAITGCAACGTAAGTTTCAATCCCAAAAGTGGCTCGACCTGTGAATACATTGATAGCGTGACTAGCGAGTACCTTTTATACGACACCAAACTGCGTCAACAGCGTCTACCGTCAAGTCCCAATATGGSATAGSAGCATGAGAGTTATCTGGCTCGCATATACCGCTTTTCACTGTCCCCGCCAGGTACACGGCCAGATAAACTAACAAATGTGCTCACGTACAGATTCAAAGTAGG  | 98% |
| scaffold_14  | CsG2 | 8338 | 192247-200584   | CsG2_DRJ1L  | 173 | 192247-192419   | GATCGACGGCAGCATCTTTTATCAACGAGTGACAATCGTACCAGCCGCCGCGATTGAGAATGAAGAAGCGGATTCATAACCTCTTGGTTGACAAAACAGAGCGTGTAGACGCAATAATCTATCCAGGGTCCCAAAGGCCACATACCGTACGATCTTTGAGACCGACGGA                                                                                                                                                                                                                                                                                                                                                                                                                                                                                                                                               | 74% |
| scaffold_14  | CsG2 | 8338 | 192247-200584   | CsG2_DRJ1R  | 173 | 200412-200584   | GATCGATGGCAGCATCTTCCATCAGCCAGCCCAACATCACGAGCCTCCGGCATCGAAGAATGAAGAACAATTTGATAACCTCTTGTATTGACCCAGCGGAGCGTGTGGATGGCATGATCGTTTGAAGGGTTCAAAGGTCGTATACTTAATAATTTTACAGCCACGGA                                                                                                                                                                                                                                                                                                                                                                                                                                                                                                                                                 | 74% |
| scaffold_14  | CsG  | 8656 | 76017-84672     | CsG_DRJ1L   | 372 | 76017-76388     | ACAGATTTGACATGAAAATGTTTCTCCCGGAGTGTGAGTAAGAGACGGTAAGATAAATTTCTGTTATCTTCAGCTCTCACTTTTCAACAATGATCCCATGATACGAGTGTAGACGCAATAATGCTGCGCAGTGTGACGCAACTGTGCGAGCAACTGTGCGAGCAAGCTCCCAACATGTCACACTGTTTCGCGTAACTTTCTCGTGA                                                                                                                                                                                                                                                                                                                                                                                                                                                                                                          | 97% |
| scaffold_14  | CsG  | 8656 | 76017-84672     | CsG_DRJ1R   | 372 | 84301-84672     | ACACATCTGACACTGAAAATGTTTCTCCCGGAGTGTGAGTAAGAGACGGTAAGATAAATTTCTGTTATCTTCAGCTCTCACTTTTCAACAATGATCCCATGATACGAGTGTAGACGCAATAATGCTGCGCAGTGTGACGCAACTGTGCGAGCAACTGTGCGAGCAAGCTCCCAACATGTCACACTGTTTCGCGTAACTTTCTCGTGA                                                                                                                                                                                                                                                                                                                                                                                                                                                                                                         | 97% |
| scaffold_22  | CsI  | 8779 | 695663-704441   | CsI_DRJ1L   | 204 | 695663-695866   | GACATCTCTCAGAGGACATCTCTACCAATCCAGTCAAGCATTCGCCAGTCCAGCTCGAGGATTCCGATCTTCTGAGTTGCGGTTGATGATTAGATAGTAGATGTCCTGTGTTAGAGATGCTCTCTACAGCCACCAAGTTTTTTTCTGTATTTCAGTTTGAAAAAGTGAATGTTGACAGCTAAGAGCGTAGACCAATCATG                                                                                                                                                                                                                                                                                                                                                                                                                                                                                                                | 84% |
| scaffold_22  | CsI  | 8779 | 695663-704441   | CsI_DRJ1R   | 202 | 704240-704441   | GAAATCTCTACCCACCGGACATCTCTACCAAGTCCAGTCAAGCAATCCCAACCCAAAGATTCCAATCTTCTGAGTTTCAATTTGGTGGATTGGATGGTAGAGAGGCGCCTCGGTAAGAGTGTGACTTACAGCCACCAAGTTTTTTTCTGTATTTCAGTTTGAAAAAGTGAATGTTGACAGCTAAGAGCGTAGACCGGATTCATG                                                                                                                                                                                                                                                                                                                                                                                                                                                                                                            | 84% |
| scaffold_128 | CsI2 | 9042 | 110016-119057   | CsI2_DRJ1L  | 174 | 110016-110189   | CGCCTGAAAACGGCCTTCAATTAATCTGGAAACGAACTAAGACAGTTGGACTAACAAGAAATCGTGGCTCAGCGACTCAATCTTCAATGTAATCTAACCA                                                                                                                                                                                                                                                                                                                                                                                                                                                                                                                                                                                                                    | 75% |
| scaffold_128 | CsI2 | 9042 | 110016-119057   | CsI2_DRJ1R  | 177 | 118881-119057   | CGCCTGATAAGACATTCAGTTAATTCGGACACCAACCTCTCTCAGGTGGCCTCAGCGGCGCTCAGCGATTCTCAACCTTAAATGCAATCTCACTATGATTGGTACTTGTAAACACCCCGCCTGCTCAAGCCAAAGTGTGTAAGCAGAAAGCAGGGAACAAT                                                                                                                                                                                                                                                                                                                                                                                                                                                                                                                                                       | 75% |
| scaffold_38  | CsH  | 9050 | 1398066-1407115 | CsH_DRJ1L   | 731 | 1398066-1398796 | GCAAATGTTGAGTGCATAGCCTACCTGCTGTTGGACGGTGACGAAGTTGGAACACCGTGTATCATTTGAGCGAAGCGCTTTGCGAATTTGAAATTTATTTCCAAAGTGAATGCGTTAAGCCCTTCAAATAGCCTTCAGATGTTTTAGCGGAGTTTTTCAACAAGCTCAAGAATGACGTTGGTGCATAATGCTGCAACGGCACGTA                                                                                                                                                                                                                                                                                                                                                                                                                                                                                                           | 98% |
| scaffold_38  | CsH  | 9050 | 1398066-1407115 | CsH_DRJ1R   | 731 | 1406385-1407115 | GCAAATGTTGAGTGCATAGCCTACCTGCTGTTGGACGGTGACGAAGTTGGAACACCGTGTATCATTTGAGCGAAGCGCTTTGCGAATTTGAAATTTATTTCCAAAGTGAATGCGTTAAGCCCTTCAAATAGCCTTCAGATGTTTTAGCGGAGTTTTTCAACAAGCTCAAGAATGACGTTGGTGCATAATGCTGCAACGGCACGTA                                                                                                                                                                                                                                                                                                                                                                                                                                                                                                           | 98% |
| scaffold_16  | CsX6 | 9213 | 504600-513812   | CsX6_DRJ1L  | 234 | 504600-504833   | TAACTAGATCTTACTTTGGTCTGTGGAAGACGTGACCCGGTCAAGTTGTCATTTTCGATCAAACTTATAGTCTTCCGTTTAAATTTCTCAGCGTTGAAAGATTGCTCTCGAGATCTGATCCGAAGCATAGAACGACTATGAATCGTCTACGCTTAGTCTTCACTATTTCACTTTTGCAAACTGAATACAGAAAAAAGC                                                                                                                                                                                                                                                                                                                                                                                                                                                                                                                  | 89% |
| scaffold_16  | CsX6 | 9213 | 504600-513812   | CsX6_DRJ1R  | 231 | 513582-513812   | TAACTAGATCTTACTTTGGTCTGTGGAAGACGTGACCCGGTCAAGTTGTCATTTTCGATCAAACTTATAGTCTTCCGTTTAAATTTCTCAGCGTTGAAAGATTGCTCTCGAGATCTGATCCGAAGCATAGAACGACTATGAATCGTCTACGCTTAGTCTTCACTATTTCACTTTTGCAAACTGAATACAGAAAAAAGC                                                                                                                                                                                                                                                                                                                                                                                                                                                                                                                  | 89% |
| scaffold_15  | CsJ  | 9484 | 2621922-2631405 | CsJ_DRJ1L   | 342 | 2621922-2622263 | TCCTGCGAAATCCACAGCAAGACTCCGTCACCGCTCCATCGTCCGCCACGCTGCTGACATTTGCTGAGCAGTTGAAAAGTCTGCAAGAAATGACGGCTTACACGGCATCATGATGAGGTACAAGGCTGCGACAAAGCAGCAGCTGAGCTCAACCACGGTTTTATTTGCTGAGCTTCAAGGCTCGCTGATCACTCTGAGCGAAAAAAGATGCAACAATTTTTACATTTGTACATTTTTTTAGTACAGCAACCAATGATGTTGCTGCTGTATGATGATGGATGGGAATCTGCTTTTGAGTCGCTCCCGCAACATTTACGCATAACGCAAGC                                                                                                                                                                                                                                                                                                                                                                               | 75% |
| scaffold_15  | CsJ  | 9484 | 2621922-2631405 | CsJ_DRJ1int | 246 | 2628392-2628637 | TGACATCTACTCAACATTTGAAACGTCCTATGGACCTAACGGTGTGCTGAGCATGATGCGGGTGCAAAAGCTTTGACGAGCATTGACTGGGCTCACTATGTTTTTTGTTGAGCTTCAAGCGTCCGAGATGATCAATTAATGACAAAGGTCATCAATTTTTCACATCTGTACATTTTTTTGATTACCGGTAACCATTTGTTGTTACTCGTTTTATTTGGACGGATGGAAATCCGCTT                                                                                                                                                                                                                                                                                                                                                                                                                                                                            | 73% |
| scaffold_15  | CsJ  | 9484 | 2621922-2631405 | CsJ_DRJ1R   | 341 | 2631065-2631405 | TCTCTGCGAAATCCACATCAAGACTACCTTCGCTACATCGTCCAGCACACTGCTTGAATCACTAAGTAGTTGAAAAGTCTGCGAAGTGAAGCGGTTACACGCGCATCATGAGGTTACAGGCTGCGACGAGCAGCAGCTGAGCTCAACCATGTTTTATTTGTTGCTGAGCTTCAAGGCTCGCAGATGATCTCTGAGCGAAAAGATGCAACAATTTTTACATTTGATCAATTTTTTCTAGTACCGGTAACCAATTAATGTTGCTGCTGCTGCTGACTGATGAATGAGAACCTGCTTTGAGTCTGCCCGAACATTTACGCATAACGCAAGC                                                                                                                                                                                                                                                                                                                                                                                | 73% |
| scaffold_35  | CsX8 | 9999 | 164467-174465   | CsX8_DRJ1L  | 249 | 164467-164715   | TTGAGTCTGCTTCAAGCTCAGCATCTCTTGTTCGTGATCCGACTGTTTTGCTCCATTTTCAATGAACATCATCTTCTCTCCGTTCTTGGATAGCGGCAACAGGGATCAGTTTGAAGTGTGTTGCTCTCGCGCATGCTATGATTTACAGCTATTCATGATCTCCAGCAGGACCTCCCATGTCACATAACTAATCATCGTCTCGCTGACATCGTGAATAAAGAACAGTTGCTT                                                                                                                                                                                                                                                                                                                                                                                                                                                                                 | 80% |
| scaffold_35  | CsX8 | 9999 | 164467-174465   | CsX8_DRJ1R  | 252 | 174214-174465   | TTGTTGCTGTTGTAAGTGCAGCATCTTGTTCGTGATCAGAACTGTTTTCATCTTCACTTCAACTTTAACATCATATTTCTCTGCTGCTTGGATTGAAGCAACGATGGAGCTGTTGAGTGCATCTGCTCGCGCATGATCTAGTACTGATCTTATGATCTCCGAGTACCTCTCCACTGCTCACTGACGAAATCGTGAAGTGGCATGTTGAAGAACAAATGTCATC                                                                                                                                                                                                                                                                                                                                                                                                                                                                                         | 80% |

91%





|               |      |       |             |               |      |             |                                                                                                                                                                                                                                                                                                                                                                                                                                                                                                                                                                                                                                                                                                                                                                                                                                                                                                                                                                                                                                                                                                                                                              |     |     |     |     |
|---------------|------|-------|-------------|---------------|------|-------------|--------------------------------------------------------------------------------------------------------------------------------------------------------------------------------------------------------------------------------------------------------------------------------------------------------------------------------------------------------------------------------------------------------------------------------------------------------------------------------------------------------------------------------------------------------------------------------------------------------------------------------------------------------------------------------------------------------------------------------------------------------------------------------------------------------------------------------------------------------------------------------------------------------------------------------------------------------------------------------------------------------------------------------------------------------------------------------------------------------------------------------------------------------------|-----|-----|-----|-----|
| scaffold_5934 | CsX1 | 17335 | 19391-36725 | CsX1_DRJ1int1 | 216  | 21903-22118 | GATGACACGTCACGGTACCACCTTGGTCGGCAAGCATTATGATGGTGTGACAAAAGTCCAGTATCTACCTCGAACATTTGTTGCACTTTATGGACGTGG<br>GCACGTGGTGTGCAAAAAGCCTTATAAAGCTTTTACTTATCGTAGAACGTGCGGACGACGTTCCGCCAGAAATCAGTGAATATCATTGTGCGATAACAGT                                                                                                                                                                                                                                                                                                                                                                                                                                                                                                                                                                                                                                                                                                                                                                                                                                                                                                                                                  | 85% | 72% | 88% | 78% |
| scaffold_5934 | CsX1 | 17335 | 19391-36725 | CsX1_DRJint2  | 216  | 27254-27469 | GATACACGCCACGGTACCACCTTGGCCGTAAGCAGTATGATGGTGTGGCAAAGTCCAGTCTCCTCACTTAAGTATTTGTTGCAATTTATGGACGTAG<br>GCACGTGGCCGTGCAAAAAGCCTTATAAAGCTTTTACTTATCGTAGAACGTGCGGACGACGTTCCGCCAGAAATCAGTGAATATCATTGTGCGATAACAGT                                                                                                                                                                                                                                                                                                                                                                                                                                                                                                                                                                                                                                                                                                                                                                                                                                                                                                                                                   |     |     |     |     |
| scaffold_5934 | CsX1 | 17335 | 19391-36725 | CsX1_DRJ1R    | 216  | 36510-36725 | GATACACGCCACGGTACCACCTTGGCCGTAAGCAGTATGATGGTGTGGCAAAGTCCAGTCTCCTCACTTAAGTATTTGTTGCAATTTATGGACGTAG<br>GCACGTGGCCGTGCAAAAAGCCTTATAAAGCTTTTACTTATCGTAGAACGTGCGGACGACGTTCCGCCAGAAATCAGTGAATATCATTGTGCGATAACAGT                                                                                                                                                                                                                                                                                                                                                                                                                                                                                                                                                                                                                                                                                                                                                                                                                                                                                                                                                   |     |     |     |     |
| scaffold_116  | CsT  | 23217 | 7789-31005  | CsT_DRJ1L     | 638  | 7789-8426   | GTAGCCGCGACGTACAGTGTTCGACAGTCTAGSCCTCCACCAATAGCTATTACGAAAGCAGCAAGTGTTTAAAGCACTGACTATGAATATAGCCAT<br>GACTTCACAGCACCGAATATCCAAAGGACGCTGCATATTAGTTTGTCTTCGATGGCCGTTGTTTGAATGCACTGCTTTCGAGACAGGAAAAGGAAAGG<br>ATTTCAATAGAAAAGGCGTACAGATGCTAAACGTCCAACGTCAGAATCATTAGTCATATTCTGAAGAGTTCACAACCTTTGTAATTAATCAGTTGAAAAATCG<br>TACAATATATTGATTAATAAATAAGAAATAACTGGTTGATATCTGGTATTATAGGTCATTCCAAAAATGCGAATAAAAAATAAATAAATAGCAAGAAATTT<br>AACTCGTAACACACTTTTACGATCGTATCACTAATAGTATTAACTCATGCGCTGTTAATTAATTTATGTTTTCCTCAAGATAAAGATGACATTAATAATTCG<br>CAATGTCGGTAAAAGCGCGCATATTGCTGGTTCAATTTACGACCCATGTTAACATTAACACAACGCGACGTATTTCGACGCTGTTACACTGAACTCTGAAAA<br>GCTTTGTA                                                                                                                                                                                                                                                                                                                                                                                                                                                                                                   | 96% | 72% | 88% | 78% |
| scaffold_116  | CsT  | 23217 | 7789-31005  | CsT_DRJ1R     | 640  | 16673-17312 | GTAGCCGCGACGTACAGTGTTCGACAGTCTAGSCCTCCACCAATAGCTATTACGAAAGCAGCAAGTGTTTAAAGCACTGACTATGAATATAGCCAT<br>GACTTCACAGCACCGAATATCCAAAGGACGCTGCATATTAGTTTGTCTTCGATGGCCGTTGTTTGAATGCACTGCTTTCGAGACAGGAAAAGGAAAGG<br>ATTTCAATAGAAAAGGCGTACAGATGCTAAACGTCCAACGTCAGAATCATTAGTCATATTCTGAAGAGTTCACAACCTTTGTAATTAATCAGTTGAAAAATCG<br>TACAATATATTGATTAATAAATAAGAAATAACTGGTTGATATCTGGTATTATAGGTCATTCCAAAAATGCGAATAAAAAATAAATAAATAGCAAGAAATTT<br>AACTCGTAACACACTTTTACGATCGTATCACTAATAGTATTAACTCATGCGCTGTTAATTAATTTATGTTTTCCTCAAGATAAAGATGACATTAATAATTCG<br>CAATGTCGGTAAAAGCGCGCATATTGCTGGTTAAATTTACGACCCATGTTAACATTAACACAACGCGACGTATTGATCCTGGTACACTGAACTCTGAAAA<br>GCTTTGTA                                                                                                                                                                                                                                                                                                                                                                                                                                                                                                     |     |     |     |     |
| scaffold_116  | CsT  | 23217 | 7789-31005  | CsT_DRJ2L     | 1093 | 15405-16497 | TACATACATGTAGCGCAACATCGCCTAATAGATCATCGACATAGAAGCTGACATGGAATAAACGAACCTATCATCTTGAAGTGTGGGTTTTCGAATACATC<br>TAATTCGGTATCGAAGCAGCGAAGCTGCAACATGTCATACATAAACCGTGCATTAACCTTGGATGCTGAAAAAGTTGAGAGTGCTCACTGCCGTAAGTGC<br>GTATGTTATATCGTACGATATTTGTAATCCGGAGTACGACGATAGCGTTGCAAGTCCAAAGTCAAGTCAAGTCAAGTCAAGTCAAGTCAAGTCAAGTCAAGT<br>GAAAACTCATATATGCCAGACCATAGATGGCAGAAAGCGTACAGAAATTTGAACTTAAAGTACACAATTAACAAGGAGACTGATGTAATGTCACTACCTACC<br>TGAATGAAAAAATGAGCTGTCATTCTCATTTTATCATTTTATCATCTGTGACATAGCCGTTGGCCGTATCTGCTGGGTGACACCTGAACGTGGCGGCGATG<br>TATAAATCATTATTGTTGAAGCGCAGTTCCGCTCAACTCAATAGTTGTTGGTTTTCAGAGAATCACTATTAGTGTAAATAAGTGTAGAAATTTTTACCAGTTAA<br>TTTTCTTGGCCTTAAATTTTATCTCAGCGGCAAGAAAGTGAAGCCCGTGAACATTTGATACCTATTATGCGAAGAACCACTATGCCACTTCCAGTAA<br>TGATCACATATCTACCTAGCTTTTTCGAAACTGCTGATCGTTTCTGCGGTGATACAGTCAAGTCACTGATGCTCACTATTCTGTATCTTCAAGCCACAA<br>CGTTGTCATCTCAGACGCTTTTCAACATGAATAATGCGAATGACACTATGATGAGTGAATCCAAAGCTTTTGGTTTTGACCGAAGTGTCCAC<br>GAATGACGCTGACTAGGTCACTGACTTTGAATTTTTCAGAAATTTCCCGTATACAAAGCGCTTAAAGAAATTTAAAAAGATTGCACTGATGATGTA<br>TCATAGAAGTTTATTGGTAAGCAATTCGACAGCAATCTCCAGTGGAA                                    | 89% | 72% | 88% | 78% |
| scaffold_116  | CsT  | 23217 | 7789-31005  | CsT_DRJ2R     | 1132 | 29874-31005 | TACATACATGTAGCGCAACATCGCCTAATAGATCATCGACATAGAAGCTGACATGGAATAAACGAACCTATCATCTTGAAGTGTGGGTTTTCGAATACATC<br>GTATTGCGTATCAAAGCAGTCAAGACGTCGAACATGTCATGCAATGAAACCGTGCATTAACCTTGGATGCTGAAAAAGTTGAGAGTGCTCACTGCCGTAAGTGC<br>CGTATTGTTATATCGTACGATATTTGATACCGAAGTACGGCAGTAGCGTTTGCAGTGTCCAGTCAAGTCAAGTCAAGTCAAGTCAAGTCAAGTCAAGTCAAGT<br>TGAAAACTCATATATGCCAGACCATAGATGGCAGAAAGCGTACAGAAATTTGAACTTAAAGTCAAGTCAAGTCAAGTCAAGTCAAGTCAAGTCAAGTCAAGT<br>CTATCTGAAATGAATAAATGAGCTGCTCAATTTGATTTTATCATTTAATCTGTGACATAGCCGTTGGCCGTATCTGCTGGGTGACACCTGAACGTGGCGGAC<br>TGATAAATCATTATTGTTGAAGCAGTTCGCGCAACTCAATAGTTGTTGTTTTCAGAGAATCACTATTATAGAGTATGATTGGCCATAAAAATGCTGGT<br>AGTGTAAATAAGTGTAGAAATTTTTACCAGTAAATTTTTCGCGTAAATTTTATTTCTCAGCGGCAAAAAAGTGAAGCCCGTGAACATTTGATACCTAT<br>CTTATGCCAGAACCAACTATGCCACTTCCAGTAAATGATCACAATCTCACTAGCTTTTTCGAAACTGCTGATCGTTTTTGTGGGTGATACAGTGGAA<br>TGATGCTCACTATTTCTGTATCTTCAAGCCACAACGTGTCATTCTCTGCAAGACCTTTCAACATGAATAATGCGAATGACACTATGATGAGTGA<br>CCCAAGCTTTTGTGGTTTGAAGCAAGTGTCCACCAAGCAGCGGACCTTGGTGTGGTACACTGGATTTTTCAGATTTTCTACCGCATCAAGGA<br>ACCTCTAAGCATTTTGAAAAAAGTGCAGTACGATGTTACCTGGAAGCTCATTGCGAAACAATTCACACAGAAATCTACAGTGGAA |     |     |     |     |
