# Supplementary material for: Genomic architecture of endogenous ichnoviruses reveals distinct evolutionary pathways leading to virus domestication in parasitic wasps
Source: PubMed Central journal article supplement (PMC7379367; doi:10.1186/s12915-020-00822-3), 2020-07-24
Supplement: 12915_2020_822_MOESM10_ESM.pdf [file 12915_2020_822_MOESM10_ESM.pdf]

**Additional file 10.** DRJs analysis.

**Figure S3.** Examples of the different types of DRJ position. **a.** Proviral segment with two copies of a single direct repeat (DRJ1L and DRJ1R), one at each end of the segment. **b.** Proviral segment with two distinct repeated sequences (DRJ1, in yellow and DRJ2, in green), each present in two copies (DRJ1L and DRJ1R, DRJ2L and DRJ2R). **c.** Proviral segment with two repeated sequences, each present in two or more copies. DRJ1s in yellow, DRJ2s in green, HdIV genes represented by arrows.

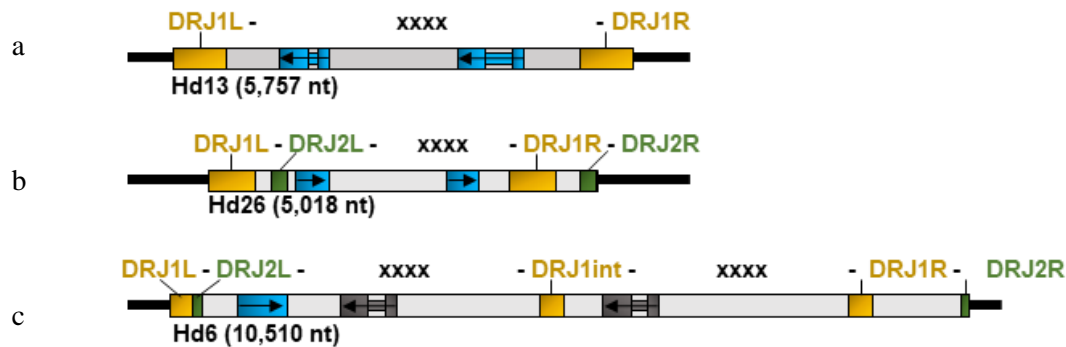

**Table S11.** DNA motifs found in the direct repeated sequences flanking the IV segments inserted in wasp genomes. Analysis was performed using the DNAMINDA2 webserver (<http://bmbf.sdstate.edu/DMINDA2/annotate.php>); the input dataset was composed of 99 DRJ sequences (right junctions of HdIV and CsIV segments). A total of 89 motifs were obtained; only those whose occurrence exceed 70% of the DRJs are reported.

| Motif    | Length (nt) | Consensus logo | Consensus sequence | Nb of occurrence in DRJs (n=99 DRJ sequences) | Nb of DRJs containing at least one motif (/99) |
|----------|-------------|----------------|--------------------|-----------------------------------------------|------------------------------------------------|
| Motif-62 | 6           |                | TGAYGA             | 1231                                          | 97                                             |
| Motif-56 | 6           |                | CAAGAA             | 638                                           | 97                                             |
| Motif-58 | 6           |                | TGCAAT             | 380                                           | 90                                             |
| Motif-68 | 7           |                | AATGTTG            | 281                                           | 82                                             |
| Motif-88 | 9           |                | GTTGTCATY          | 205                                           | 76                                             |
| Motif-10 | 8           |                | CAATMATG           | 197                                           | 75                                             |

|          |   |                                                                                   |        |     |    |
|----------|---|-----------------------------------------------------------------------------------|--------|-----|----|
| Motif-59 | 6 |  | AATGCA | 195 | 73 |
|----------|---|-----------------------------------------------------------------------------------|--------|-----|----|

**Table S12. Result of genome search using motifs predicted with DMINDA 2.0 webserver**

Occurrence rate of the motif in DRJ and whole genome sequences. Each motif was search among the 6 bp kmers present in the whole genome (201,969,604) and in the DRJs (33,930). The significance was evaluated using a Chi2 (taking into account the ratio of these motifs / all the other motifs in the DRJS and in the genome).

| Motif          | DRJ | Whole genome | P-value |
|----------------|-----|--------------|---------|
| TC[G,A]T<br>CA | 61  | 291,908      | 0.1015  |
| CAAGAA         | 31  | 169,153      | 0.6959  |
