# Supplementary material for: Genomic architecture of endogenous ichnoviruses reveals distinct evolutionary pathways leading to virus domestication in parasitic wasps
Source: PubMed Central journal article supplement (PMC7379367; doi:10.1186/s12915-020-00822-3), 2020-07-24
Supplement: 12915_2020_822_MOESM11_ESM.pdf [file 12915_2020_822_MOESM11_ESM.pdf]

## Segment Hd16

Sequences used for alignment:

- (i) DRJs from genome: Hd16\_DRJ1R, Hd16\_DRJ1L
- (ii) DRJs from BAC clone # BG-42L09+BL-56G14: left\_jct\_BGBL2, right\_jct\_BGBL2
- (iii) HdIV segments: Contig\_BGBL2-12, Contig\_BGBL2-16, Contig\_BGBL2-19, SH\_BGBL2

## Alignment

```
left_jct_BGBL2 -----
Hd16_DRJ1L -----
Contig_BGBL2-19 ATAGAGTTGTCATGAGCGTAACTACATTTAAACTTGAAGCACTGTAAGAAGGAACGGTCT
Contig_BGBL2-12 ATAGAGTTGTCATGAGCGTAACTACATTTAAACTTGAAGCACTGTAAGAAGGAACGGTCT
Contig_BGBL2-16 ATAGAGTTGTCATGAGCGTAACTACATTTAAACTTGAAGCACTGTAAGAAGGAACGGTCT
SH_BGBL2 ATAGAGTTGTCATGAGCGTAACTACATTTAAACTTGAAGCACTGTAAGAAGGAACGGTCT
right_jct_BGBL2 ATAGAGTTGTCATGAGCGTAACTACATTTAAACTTGAAGCACTGTAAGAAGGAACGGTCT
Hd16_DRJ1R -----TTGTCATGAGCGTAACTACATTTAAACTTGAAGCACTGTAAGAAGGAACGGTCT
```

```
left_jct_BGBL2 -----ATAAAATTGTCATGAGAG-----GAACTAA
Hd16_DRJ1L -----TTGTCATGAGAG-----GAACTAA
Contig_BGBL2-19 CACAGTACCTTACCTACACAAGTCTCCATCATCTTACACTAATAAGGATAAGAAAAATAA
Contig_BGBL2-12 CACAGTACCTTACCTACACAAGTCTCCATCATCTTACACTAATAAGGATAAGAAAAATAA
Contig_BGBL2-16 CACAGTACCTTACCTACACAAGTCTCCATCATCTTACACTAATAAGGATAAGAAAAATAA
SH_BGBL2 CACAGTACCTTACCTACACAAGTCTCCATCATCTTACACTAATAAGGATAAGAAAAATAA
right_jct_BGBL2 CACAGTACCTTACCTACACAAGTCTCCATCATCTTACACTAATAAGGATAAGAAAAATAA
Hd16_DRJ1R CACAGTACCTTACCTACACAAGTCTCCATCATCTTACACTAATAAGGATAAGAAAAATAA
* * * * * * * * * *
```

```
left_jct_BGBL2 ATTTAAACTTGTACCAACGTAAGAGG-----AAACGCTCTCACAGTACC-TTTAGCTGC
Hd16_DRJ1L ATTTAAACTTGTACCAACGTAAGAGG-----AAACGCTCTCACAGTACC-TTTAGCTGC
Contig_BGBL2-19 AAGTAAACACATTC AACACAAAACCTTTTATTTCAATCTAAGGAACAGTATATGCTGCACTA
Contig_BGBL2-12 AAGTAAACACATTC AACACAAAACCTTTTATTTCAATCTAAGGAACAGTATATGCTGCACTA
Contig_BGBL2-16 AAGTAAACACATTC AACACAAAACCTTTTATTTCAATCTAAGGAACAGTATATGCTGCACTA
SH_BGBL2 AAGTAAACACATTC AACACAAAACCTTTTATTTCAATCTAAGGAACAGTATATGCTGCACTA
right_jct_BGBL2 AAGTAAACACATTC AACACAAAACCTTTTATTTCAATCTAAGGAACAGTATATGCTGCACTA
Hd16_DRJ1R AAGTAAACACATTC AACACAAAACCTTTTATTTCAATCTAAGGAACAGTATATGCTGCACTA
* * * * * * * * * *
```

```
left_jct_BGBL2 AAGCTTTAGATTAGATTCAACTGCACCATGGCCGGAACCTGTTGCGAGCCGAGTCAAGCAA
Hd16_DRJ1L AAGCTTTAGATTAGATTCAACTGCACCATGGCCGGAACCTGTTGCGAGCCGAGTCAAGCAA
Contig_BGBL2-19 TTAACACTACTCAGATTAAGCTGCACCATGGCCGGAACCTGTTGCGAGCCGAGTCAAGCAA
Contig_BGBL2-12 TTAACACTACTCAGATTAAGCTGCACCATGGCCGGAACCTGTTGCGAGCCGAGTCAAGCAA
Contig_BGBL2-16 TTAACACTACTCAGATTAAGCTGCACCATGGCCGGAACCTGTTGCGAGCCGAGTCAAGCAA
SH_BGBL2 TTAACACTACTCAGATTAAGCTGCACCATGGCCGGAACCTGTTGCGAGCCGAGTCAAGCAA
right_jct_BGBL2 TTAACACTACTCAGATTAAGCTGCACCATGGCCGGAACCTGTTGCGAGCCGAGTCAAGCAA
Hd16_DRJ1R TTAACACTACTCAGATTAAGCTGCACCATGGCCGGAACCTGTTGCGAGCCGAGTCAAGCAA
* * * * * * * * * *
```

```
left_jct_BGBL2 CACTTCTGTGTCCGTACGTTTCAGCCATAGAATAATATTCCAAGACGCTCTGGATTGTTTTG
Hd16_DRJ1L CACTTCTGTGTCCGTACGTTTCAGCCATAGAATAATATTCCAAGACGCTCTGGATTGTTTTG
Contig_BGBL2-19 CACTTCTGTGTCCGTACGTTTCAGCCATAGAATAATATTCCAAGACGCTCTGGATTGTTTTG
Contig_BGBL2-12 CACTTCTGTGTCCGTACGTTTCAGCCATAGAATAATATTCCAAGACGCTCTGGATTGTTTTG
Contig_BGBL2-16 CACTTCTGTGTCCGTACGTTTCAGCCATAGAATAATATTCCAAGACGCTCTGGATTGTTTTG
SH_BGBL2 CACTTCTGTGTCCGTACGTTTCAGCCATAGAATAATATTCCAAGACGCTCTGGATTGTTTTG
right_jct_BGBL2 CACTTCTGTGTCCGTACGTTTCAGCCATAGAATAATATTCCAAGACGCTCTGGATTGTTTTG
Hd16_DRJ1R CACTTCTGTGTCCGTACGTTTCAGCCATAGAATAATATTCCAAGACGCTCTGGATTGTTTTG
* * * * * * * * * *
```

```
left_jct_BGBL2 ATGCACATTTGCAATGATCTCAGTGAACATCTCTTTAGATTCTTTAAGAAGAATCGCGGG
Hd16_DRJ1L ATGCACATTTGCAATGATCTCAGTGAACATCTCTTTAGATTCTTTAAGAAGAATCGCGGG
Contig_BGBL2-19 ATGCACATTTGCAATGATCTCAGTGAACATCTCTTTAGATTCTTTAAGAAGAATCGCGGG
Contig_BGBL2-12 ATGCACATTTGCAATGATCTCAGTGAACATCTCTTTAGATTCTTTAAGAAGAATCGCGGG
Contig_BGBL2-16 ATGCACATTTGCAATGATCTCAGTGAACATCTCTTTAGATTCTTTAAGAAGAATCGCGGG
SH_BGBL2 ATGCACATTTGCAATGATCTCAGTGAACATCTCTTTAGATTCTTTAAGAAGAATCGCGGG
right_jct_BGBL2 ATGCACATTTGCAATGATCTCAGTGAACATCTCTTTAGATTCTTTAAGAAGAATCGCGGG
Hd16_DRJ1R ATGCACATTTGCAATGATCTCAGTGAACATCTCTTTAGATTCTTTAAGAAGAATCGCGGG
* * * * * * * * * *
```

left\_jct\_BGBL2 GATCATATATTTAGTCAACCATGCGGAGACGTGCGCCGTACAGAAATGATGCCAGTGGAG  
Hd16\_DRJ1L GATCATATATTTAGTCAACCATGCGGAGACGTGCGCCGTACAGAAATGATGCCAGTGGAG  
Contig\_BGBL2-19 GATCATATATTTAGTCAACCATGCGGAGACGTGCGCCGTACAGAAATGATGCCAGTGGAG  
Contig\_BGBL2-12 GATCATATATTTAGTCAACCATGCGGAGACGTGCGCCGTACAGAAATGATGCCAGTGGAG  
Contig\_BGBL2-16 GATCATATATTTAGTCAACCATGCGGAGACGTGCGCCGTACAGAAATGATGCCAGTGGAG  
SH\_BGBL2 GATCATATATTTAGTCAACCATGCGGAGACGTGCGCCGTACAGAAATGATGCCAGTGGAG  
right\_jct\_BGBL2 GATCATATATTTAGTCAACCATGCGGAGACGTGCGCCGTACAGAAATGATGCCAGTGGAG  
Hd16\_DRJ1R GATCATATATTTAGTCAACCATGCGGAGACGTGCGCCGTACAGAAATGATGCCAGTGGAG  
\*\*\*\*\*

left\_jct\_BGBL2 TTCGTTCTTACACTCACGTCCAGGTGAAACCACTTTATTTGGGTTTTTCTCGCAGGAGCA  
Hd16\_DRJ1L TTCGTTCTTACACTCACGTCCAGGTGAAACCACTTTATTTGGGTTTTTCTCGCAGGAGCA  
Contig\_BGBL2-19 TTCGTTCTTACACTCACGTCCAGGTGAAACCACTTTATTTGGGTTTTTCTCGCAGGAGCA  
Contig\_BGBL2-12 TTCGTTCTTGCACACTCACGTCCAGGTGAAACCACTTTATTTGGGTTTTTCTCGCAGGAGCA  
Contig\_BGBL2-16 TTCGTTCTTGCACACTCACGTCCAGGTGAAACCACTTTATTTGGGTTTTTCTCGCAGGAGCA  
SH\_BGBL2 TTCGTTCTTGCACACTCACGTCCAGGTGAAACCACTTTATTTGGGTTTTTCTCGCAGGAGCA  
right\_jct\_BGBL2 TTCGTTCTTGCACACTCACGTCCAGGTGAAACCACTTTATTTGGGTTTTTCTCGCAGGAGCA  
Hd16\_DRJ1R TTCGTTCTTGCACACTCACGTCCAGGTGAAACCACTTTATTTGGGTTTTTCTCGCAGGAGCA  
\*\*\*\*\*

left\_jct\_BGBL2 GGTGTCGCTGGCGACCGCCTTGCACTTCTGGAAGCGAATCTTCTTCACGAACGTGTAGTAT  
Hd16\_DRJ1L GGTGTCGCTGGCGACCGCCTTGCACTTCTGGAAGCGAATCTTCTTCACGAACGTGTAGTAT  
Contig\_BGBL2-19 GGTGTCGCTGGCGACCGCCTTGCACTTCTGGAAGCGAATCTTCTTCACGAACGTGTAGTAT  
Contig\_BGBL2-12 GGTGTCGCTGGCGACCGCCTTGCACTTCTGGAAGCGAATCTTCTTCACGAACGTGTAGTAT  
Contig\_BGBL2-16 GGTGTCGCTGGCGACCGCCTTGCACTTCTGGAAGCGAATCTTCTTCACGAACGTGTAGTAT  
SH\_BGBL2 GGTGTCGCTGGCGACCGCCTTGCACTTCTGGAAGCGAATCTTCTTCACGAACGTGTAGTAT  
right\_jct\_BGBL2 GGTGTCGCTGGCGACCGCCTTGCACTTCTGGAAGCGAATCTTCTTCACGAACGTGTAGTAT  
Hd16\_DRJ1R GGTGTCGCTGGCGACCGCCTTGCACTTCTGGAAGCGAATCTTCTTCACGAACGTGTAGTAT  
\*\*\*\*\*

left\_jct\_BGBL2 TACGGGCAGCCTCACAAAATCTCTCTCACCCGGCGCCGCTCCAAAATAGAGGCATGAG  
Hd16\_DRJ1L TACGGGCAGCCTCACAAAATCTCTCTCACCCGGCGCCGCTCCAAAATAGAGGCATGAG  
Contig\_BGBL2-19 TACGGGCAGCCTCACAAAATCTCTCTCACCCGGCGCCGCTCCAAAATAGAGGCATGAG  
Contig\_BGBL2-12 TACGGGCAGCCTCACAAAATCTCTCTCACCCGGCGCCGCTCCAAAATAGAGGCATGAG  
Contig\_BGBL2-16 TATGGGCAGCCTCACAAAATCTCTCTCACCCGGCGCCGCTCCAAAATAGAGGCATGAG  
SH\_BGBL2 TACGGGCAGCCTCACAAAATCTCTCTCACCCGGCGCCGCTCCAAAATAGAGGCATGAG  
right\_jct\_BGBL2 TACGGGCAGCCTCACAAAATCTCTCTCACCCGGCGCCGCTCCAAAATAGAGGCATGAG  
Hd16\_DRJ1R TACGGGCAGCCTCACAAAATCTCTCTCACCCGGCGCCGCTCCAAAATAGAGGCATGAG  
\*\* \*\*\*\*\*

left\_jct\_BGBL2 CCAGTCCCAATTTATCAGCAGGCGATCTTCTTCTGGCCTTGTTGCATCGAAGCTGTAGCG  
Hd16\_DRJ1L CCAGTCCCAATTTATCAGCAGGCGATCTTCTTCTGGCCTTGTTGCATCGAAGCTGTAGCG  
Contig\_BGBL2-19 CCAGTCCCAATTTATCAGCAGGCGATCTTCTTCTGGCCTTGTTGCATCGAAGCTGTAGCG  
Contig\_BGBL2-12 CCAGTCCCAATTTATCAGCAGGCGATCTTCTTCTGGCCTTGTTGCATCGAAGCTGTAGCG  
Contig\_BGBL2-16 CCAGTCCCAATTTATCAGCAGGCGATCTTCTTCTGGCCTTGTTGCATCGAAGCTGTAGCG  
SH\_BGBL2 CCAGTCCCAATTTATCAGCAGGCGATCTTCTTCTGGCCTTGTTGCATCGAAGCTGTAGCG  
right\_jct\_BGBL2 CCAGTCCCAATTTATCAGCAGGCGATCTTCTTCTGGCCTTGTTGCATCGAAGCTGTAGCG  
Hd16\_DRJ1R CCAGTCCCAATTTATCAGCAGGCGATCTTCTTCTGGCCTTGTTGCATCGAAGCTGTAGCG  
\*\*\*\*\*

left\_jct\_BGBL2 GACGGGGCATGCCTTCCCGTTCAGGAAAGTCAAGTCCAGGTTTCGGATCGATGTAAGAAA  
Hd16\_DRJ1L GACGGGGCATGCCTTCCCGTTCAGGAAAGTCAAGTCCAGGTTTCGGATCGATGTAAGAAA  
Contig\_BGBL2-19 GACGGGGCATGCCTTCCCGTTCAGGAAAGTCAAGTCCAGGTTTCGGATCGATGTAAGAAA  
Contig\_BGBL2-12 GACGGGGCATGCCTTCCCGTTCAGGAAAGTCAAGTCCAGGTTTCGGATCGATGTAAGAAA  
Contig\_BGBL2-16 GACGGGGCATGCCTTCCCGTTCAGGAAAGTCAAGTCCAGGTTTCGGATCGATGTAAGAAA  
SH\_BGBL2 GACGGGGCATGCCTTCCCGTTCAGGAAAGTCAAGTCCAGGTTTCGGATCGATGTAAGAAA  
right\_jct\_BGBL2 GACGGGGCATGCCTTCCCGTTCAGGAAAGTCAAGTCCAGGTTTCGGATCGATGTAAGAAA  
Hd16\_DRJ1R GACGGGGCATGCCTTCCCGTTCAGGAAAGTCAAGTCCAGGTTTCGGATCGATGTAAGAAA  
\*\*\*\*\*

left\_jct\_BGBL2 CTGTTGATATGCTACGTTGAAACGTATAAATTCGATGAAGCTGAAAGGGGCGCCATTCCG  
Hd16\_DRJ1L CTGTTGATATGCTACGTTGAAACGTATAAATTCGATGAAGCTGAAAGGGGCGCCATTCCG  
Contig\_BGBL2-19 CTGTTGATATGCTACGTTGAAACGTATAAATTCGATGAAGCTGAAAGGGGCGCCATTCCG  
Contig\_BGBL2-12 CTGTTGATATGCTACGTTGAAACGTATAAATTCGATGAAGCTGAAAGGGGCGCCATTCCG  
Contig\_BGBL2-16 CTGTTGATATGCTACGTTGAAACGTATAAATTCGATGAAGCTGAAAGGGGCGCCATTCCG  
SH\_BGBL2 CTGTTGATATGCTACGTTGAAACGTATAAATTCGATGAAGCTGAAAGGGGCGCCATTCCG  
right\_jct\_BGBL2 CTGTTGATATGCTACGTTGAAACGTATAAATTCGATGAAGCTGAAAGGGGCGCCATTCCG  
Hd16\_DRJ1R CTGTTGATATGCTACGTTGAAACGTATAAATTCGATGAAGCTGAAAGGGGCGCCATTCCG  
\*\*\*\*\*

```

left_jct_BGBL2      CATGGCAGGCCCGCGGAACGTGAAGGTGTCCACCGGGTAAGTATGTGTTCTGTGCGTGATC
Hd16_DRJ1L         CATGGCAGGCCCGCGGAACGTGAAGGTGTCCACCGGGTAAGTATGTGTTCTGTGCGTGATC
Contig_BGBL2-19    CATGGCAGGCCCGCGGAACGTGAAGGTGTCCACCGGGTAAGTATGTGTTCTGTGCGTGATC
Contig_BGBL2-12    CATGGCAGGCCCGCGGAACGTGAAGGTGTCCACCGGGTAAGTATGTGTTCTGTGCGTGATC
Contig_BGBL2-16    CATGGCAGGCCCGCGGAACGTGAAGGTGTCCACCGGGTAAGTATGTGTTCTGTGCGTGATC
SH_BGBL2           CATGGCAGGCCCGCGGAACGTGAAGGTGTCCACCGGGTAAGTATGTGTTCTGTGCGTGATC
right_jct_BGBL2    CATGGCAGGCCCGCGGGACGTGAAGGTGTCCACCGGGTAAGTAAGTGTTCTGTGCGTGATC
Hd16_DRJ1R         CATGGCAGGCCCGCGGGACGTGAAGGTGTCCACCGGGTAAGTAAGTGTTCTGTGCGTGATC
*****

```

```

left_jct_BGBL2      TTCGTTGAACGGCATGTTGAGTTCTGGATATCACCTGCGTCTGGACGATGTTCCCTTTGTG
Hd16_DRJ1L         TTCGTTGAACGGCATGTTGAGTTCTGGATATCACCTGCGTCTGGACGATGTTCCCTTTGTG
Contig_BGBL2-19    TTCGTTGAACGGCATGTTGAGTTCTGGATATCACCTGCGTCTGGACGATGTTCCCTTTGTG
Contig_BGBL2-12    TTCGTTGAACGGCATGTTGAGTTCTGGATATCACCTGCGTCTGGACGATGTTCCCTTTGTG
Contig_BGBL2-16    TTCGTTGAACGGCATGTTGAGTTCTGGATATCACCTGCGTCTGGACGATGTTCCCTTTGTG
SH_BGBL2           TTCGTTGAACGGCATGTTGAGTTCTGGATATCACCTGCGTCTGGACGATGTTCCCTTTGTG
right_jct_BGBL2    TTCGTGAACGGCATGTTGAGTTCTGGATATCACCTGCGTCTGGATGATGTTCCCTCGTG
Hd16_DRJ1R         TTCGTGAACGGCATGTTGAGTTCTGGATATCACCTGCGTCTGGATGATGTTCCCTCGTG
*****

```

```

left_jct_BGBL2      AATGTTCACGGTTGAGTGTCTAGCCGTCGACTGCGCGCAAATCCATTTATACCACTCCA
Hd16_DRJ1L         AATGTTCACGGTTGAGTGTCTAGCCGTCGACTGCGCGCAAATCCATTTATACCACTCCA
Contig_BGBL2-19    AATGTTCACGGTTGAGTGTCTAGCCGTCGACTGCGCGCAAATCCATTTATACCACTCCA
Contig_BGBL2-12    AATGTTCACGGTTGAGTGTCTAGCCGTCGACTGCGCGCAAATCCATTTATACCACTCCA
Contig_BGBL2-16    AATGTTCACGGTTGAGTGTCTAGCCGTCGACTGCGCGCAAATCCATTTATACCACTCCA
SH_BGBL2           AATGTTCACGGTTGAGTGTCTAGCCGTCGACTGCGCGCAAATCCATTTATACCACTCCA
right_jct_BGBL2    AATGTTCACGGTTGAGTGTCTAGCCGTCGACTGCGCGCAAATCCATTTATACCACTCCA
Hd16_DRJ1R         AATGTTCACGGTTGAGTGTCTAGCCGTCGACTGCGCGCAAATCCATTTATACCACTCCA
*****

```

```

left_jct_BGBL2      TAGCTTATCAT
Hd16_DRJ1L         TAGCTTATCAT
Contig_BGBL2-19    TAGCTTATCAT
Contig_BGBL2-12    TAGCTTATCAT
Contig_BGBL2-16    TAGCTTATCAT
SH_BGBL2           TAGCTTATCAT
right_jct_BGBL2    TAATTTATCAT
Hd16_DRJ1R         TAATTTATCAT
** *****

```

## Segment Hd29 (present in BAC clone # BR-08001)

Sequences used for alignment:

- (i) DRJs from genome: Hd29\_DRJ1R, Hd29\_DRJ1L
- (ii) DRJs from BAC clone # BR-08001: left\_jct\_BR, right\_jct\_BR
- (iii) HdIV segments: Contig\_BR-1, Contig\_BR-4, Contig\_BR-7, Contig\_BR-10, SH\_BR

## Alignment

```

left_jct_BR      -----TAGCGATCGCAGTGCCTCGCTGCAT
Hd29_DRJ1L      ATTTTCGTGGCAGGCTTAGTT-TTGATGGAGGGACGTAGCGATCGCAGTGCCTCGCTGCAT
Contig_BR-10    -----TGGCCACCGCTGTGCGTTGTTGAAC
Contig_BR-1     -----TGGCCACCGCTGTGCGTTGTTGAAC
Contig_BR-7     -----TGGCCACCGCTGTGCGTTGTTGAAC
SH_BR          -----TGGCCACCGCTGTGCGTTGTTGAAC
Contig_BR-4     -----TGGCCACCGCTGTGCGTTGTTGAAC
right_jct_BR    -----TGGCCACCGCTGTGCGTTGTTGAAC
Hd29_DRJ1R      ATTTTCGTGGCAAGCGACTTTTCATCGTAGAACGGATGGCCACCGCTGTGCGTTGTTGAAC
*****

```

```

left_jct_BR      CAATGATGCAGCTTTGTGTTCTTCTCGAACGGTGAACATTCGTGCAACCACTGACACG
Hd29_DRJ1L      CAATGATGCAGCTTTGTGTTCCTTCTCGAACGGTGAACATTCGTGCAACCACTGACACG
Contig_BR-10    CAATGATCCAACTTTGTGTTCTTCAGGAACGGTGAACATTCGTGCAACTACTTGACACG
Contig_BR-1     CAATGATCCAACTTTGTGTTCTTCAGGAACGGTGAACATTCGTGCAACTACTTGACACG
Contig_BR-7     CAATGATCCAACTTTGTGTTCTTCAGGAACGGTGAACATTCGTGCAACTACTTGACACG
SH_BR          CAATGATCCAACTTTGTGTTCTTCAGGAACGGTGAACATTCGTGCAACTACTTGACACG
Contig_BR-4     CAATGATCCAACTTTGTGTTCTTCAGGAACGGTGAACATTCGTGCAACTACTTGACACG
right_jct_BR    CAATGATCCAACTTTGTGTTCTTCAGGAACGGTGAACATTCGTGCAATCAACTTGACACG
Hd29_DRJ1R      CAATGATCCAACTTTGTGTTCTTCAGGAACGGTGAACATTCGTGCAATCAACTTGACACG
*****

```



## Segment Hd22

Sequences used for alignment:

- (i) DRJs from genome: Hd22\_DRJ1R, Hd22\_DRJ1L
- (ii) DRJs from BAC clone # CN-29M18: left\_junction, right\_junction
- (iii) HdIV segments: Contig\_CN-31, Contig\_CN-33, Contig\_CN-36, Contig\_CN-39

## Alignment

```
left_junction      CAATAGGGTGAATTCAAACGCTGGTCCAATGGCAGGAGCTTGGCAGGACAGATGACATC
Hd22_DRJ1L        -----AATTCAAACGCTGGTCCCAATGGCAGGAGCTTGGCAGGACAGATGACATC
Contig_CN-31      CAATAGGGTGAATTCAAACGCTGGTCCAATGGCAGGAGCTTGGCAGGACAGATGACATC
Contig_CN-33      CAATAGGGTGAATTCAAACGCTGGTCCAATGGCAGGAGCTTGGCAGGACAGATGACATC
Contig_CN-39      CAATAGGGTGAATTCAAACGCTGGTCCAATGGCAGGAGCTTGGCAGGACAGATGACATC
Contig_CN-36      CAATAGGGTGAATTCAAACGCTGGTCCAATGGCAGGAGCTTGAACAAGGCAGATGATATC
right_junction    CATTGAGAAAACTCAAGCGCCGATAGCAATGGCAGGAGCTTGACAAGGCAGATGATATC
Hd22_DRJ1R        -----AACTCAAGCGCCGATAGCAATGGCAGGAGCTTGACAAGGCAGATGATATC
                    **  ****  * * * * *  *****  * * *  *****  **
```

```
left_junction      GAGTGAAATGCGTAGGAGTCTGAAACAGCGCGTCGTGAACAATATCGTGACCATTGATCGC
Hd22_DRJ1L        GAGTGAAATGCGTAGGAGTCTGAAACAGCGCGTCGTGAACAATATCGTGACCATTGATCGC
Contig_CN-31      GAGTGAAATGCGTAGGAGTCTGAAACAGCGCGTCGTGAACAATATCGTGACCATTGATCGC
Contig_CN-33      GAGTGAAATGCGTAGGAGTCTGAAACAGCGCGTCGTGAACAATATCGTGACCATTGATCGC
Contig_CN-39      GAGTGAAATGCGTAGGAGTCTGAAACAGCGCGTCGTGAACAATATCGTGACCATTGATCGC
Contig_CN-36      GAGTGAGTGCCTAGGTCCTGGAACCGCGGGTCGTGAACAATATCGTGACCATTGATCGC
right_junction    GAGTGAGTGCCTAGGTCCTGGAACCGCGGGTCGTGAACAATATCGTGACCATTGATCGC
Hd22_DRJ1R        GAGTGAGTGCCTAGGTCCTGGAACCGCGGGTCGTGAACAATATCGTGACCATTGATCGC
                    *****  *****  * * * * *  * * *  *****  *****  *****
```

```
left_junction      CATAGCGACTTGCCGCACTCTCAGGATCGTGATCTAAAA-----CGTTTCACGTGA
Hd22_DRJ1L        CATAGCGACTTGCCGCACTCTCAGGATCGTGATCTAAAA-----CGTTTCACGTGA
Contig_CN-31      CACAGCGACTTGGCGACTTGGCACACGTCAGCGTCAAGTTCACAAAAATCTGACGCGA
Contig_CN-33      CACAGCGACTTGGCGACTTGGCACACGTCAGCGTCAAGTTCACAAAAATCTGACGCGA
Contig_CN-39      CATAGCGACTTGCGCACTTGGCACACGTCAGCGTCAAGTTCACAAAAATCTGACGCGA
Contig_CN-36      CACAGCGACTTGGCGACTTGGCACACGTCAGCGTCAAGTTCACAAAAATCTGACGCGA
right_junction    CACAGCGACTTGCCGCACTTGGCACACGTCAGCGTCAAGTTCACAAAAATCTGACGCGA
Hd22_DRJ1R        CACAGCGACTTGCCGCACTTGGCACACGTCAGCGTCAAGTTCACAAAAATCTGACGCGA
                    **  *****  * * *  *  *  *  *  *  *  *  *  *  *  *  *  *  *  *  *
```

## Segment Hd19

Sequences used for alignment:

- (i) DRJs from genome: Hd19\_DRJ1R, Hd19\_DRJ1L
- (ii) DRJs from BAC clone # CP-38F08+CQ-40J21: CPCQ\_right, CPCQ\_left
- (iii) HdIV segments: jct\_CPCQ-28, jct\_CPCQ-27, jct\_CPCQ-23, jct\_CPCQ-22

## Alignment

```
CPCQ_left         TTTTTGCTGGTTCATGTTTCAGAGCAGCCGGTCTATGTGATACACGCTGCTTAGCCTGGT
Hd19_DRJ1L        TTTTTGCTGGTTCATGTTTCAGAGCAGCCGGTCTATGTGATACACGCTGCTTAGCCTGGT
jct_CPCQ-28      TTTTTGCTGCTTCATGTTCTCAGAGCAGCTTGTCTACATGATACACGCTGATTTGTC-TGT
jct_CPCQ-27      TTTTTGCTGCTTCATGTTCTCAGAGCAGCTTGTCTACATGATACACGCTGATTTGTC-TGT
jct_CPCQ-23      TTTTTGCTGCTTCATGTTCTCAGAGCAGCTTGTCTACATGATACACGCTGATTTGTC-TGT
jct_CPCQ-22      TTTTTGCTGCTTCATGTTCTCAGAGCAGCTTGTCTACATGATACACGCTGATTTGTC-TGT
CPCQ_right       TTTTTGCTGCTTCATGTTCTCAGAGCAGCTTGTCTACATGATACACGCTGATTTGTC-TGT
Hd19_DRJ1R        TTTTTGCTGCTTCATGTTCTCAGAGCAGCTTGTCTACATGATACACGCTGATTTGTC-TGT
                    *****  *****  *****  *****  *****  *****  *****  *****
```

|             |                                               |
|-------------|-----------------------------------------------|
| CPCQ_left   | GACGGCACGATGGTTCCCTCATGCTGCACGAGCTCTGTGAGCTTT |
| Hd19_DRJ1L  | GACGGCACGATGGTTCCCTCATGCTGCACGAGCTCTGTGAGCTTT |
| jct_CPCQ-28 | GACGGCACGATGGTTCCCTCATGCTGCACGAGCTCTGTGAGCTTT |
| jct_CPCQ-27 | GACGGCACGATGGTTCCCTCATGCTGCACGAGCTCTGTGAGCTTT |
| jct_CPCQ-23 | GACGGCACGATGGTTCCCTCATGCTGCACGAGCTCTGTGAGCTTT |
| jct_CPCQ-22 | GACGGCACGATAATTCCCTCATGCTGCACGAGCTCTGTGAGCTTT |
| CPCQ_right  | GACGGCACGATAATTCCCTCATGCTGCACGAGCTTTGTGAGCTTT |
| Hd19_DRJ1R  | GACGGCACGATAATTCCCTCATGCTGCACGAGCTTTGTGAGCTTT |

\*\*\*\*\* \*\* \* \*\* \* \*\*\*\*\* \*\* \* \*\*\*\*\*

## Segments Hd28

Sequences used for alignment:

- (i) DRJs from genome: Hd28\_DRJ1R, Hd28\_DRJ1L, Hd24\_DRJ1R (reverse), Hd24\_DRJ1L (reverse)
- (ii) DRJs from BAC clone # CR-47M17: CR\_left, CR\_right
- (iii) HdIV segments: Contig\_CR-05, Contig\_CR-06, Contig\_CR-09, Contig\_CR-10

## Alignment

|              |                                                               |
|--------------|---------------------------------------------------------------|
| CR_left      | GCCTTTGAGCTGAGCT-GCATGAGGTTTTCATGTCCGATAACTGGATTCATTTGTCA     |
| Hd28_DRJ1L   | GCCTTTGAGCTGAGCT-GCATGAGGTTTTCATGTCCGATAACTGGATTCATTTGTCA     |
| Contig_CR-05 | GCCTTTGGAGCTAAACTTGCACGAGATTTCCGGTGTCCGTGATAACTGAATGGCATTGTCA |
| Contig_CR-06 | GCCTTTGGAGCTAAACTTGCACGAGATTTCCGGTGTCCGTGATAACTGAATGGCATTGTCA |
| CR_right     | GCCTTTGAGCTAAACTTGCACGAGATTTCCGGTGTCCGTGATAACTGAATGGCATTGTCA  |
| Hd28_DRJ1R   | GCCTTTGAGCTAAACTTGCACGAGATTTCCGGTGTCCGTGATAACTGAATGGCATTGTCA  |

\*\*\*\*\* \*\* \* \*\* \* \*\* \* \*\* \* \* \*\* \* \*\*\*\*\* \*\* \*\*\*\*\*

|              |                                                           |
|--------------|-----------------------------------------------------------|
| CR_left      | GGCGTAAGCATTATGACGGCGGTGGTGTAGGCGTTGCTTGGGAAGGTTGGTGAACCG |
| Hd28_DRJ1L   | GGCGTAAGCATTATGACGGCGGTGGTGTAGGCGTTGCTTGGGAAGGTTGGTGAACCG |
| Contig_CR-05 | GGCGTAATATTTATGACGGC-----GGTGATG                          |
| Contig_CR-06 | GGCGTAATATTTATGACGGC-----GGTGATG                          |
| CR_right     | GGCGTAAATTTATGACGGC-----GGTGATG                           |
| Hd28_DRJ1R   | GGCGTAAATTTATGACGGC-----GGTGATG                           |

\*\*\*\*\* \*\*\*\*\* \* \* \* \*\*\*\*\* \* \* \* \*\*\*\*\* \*\* \*\*\*\*\*

|              |                                                                |
|--------------|----------------------------------------------------------------|
| CR_left      | TCCACGTAGATTTCAGGCGTGAACGGAGAGCTGAAGGTATAGTAGTCGTTTCGACCAACT   |
| Hd28_DRJ1L   | TCCACGTAGATTTCAGGCGTGAACGGAGAGCTGAAGGTATAGTAGTCGTTTCGACCAACT   |
| Contig_CR-05 | TTAACGTAGGTTTCAGGCGTTAGACTGAGAGCCGGAAGGTATGGTAGTCGTTTCGACCGTCT |
| Contig_CR-06 | TTAACGTAGGTTTCAGGCGTTAGACTGAGAGCCGGAAGGTATGGTAGTCGTTTCGACCGTCT |
| CR_right     | TTAACGTAGGTTTCAGGCGTTAGACTGAGAGCCGGAAGGTATGGTAGTCGTTTCGACCGTCT |
| Hd28_DRJ1R   | TTAACGTAGGTTTCAGGCGTTAGACTGAGAGCCGGAAGGTATGGTAGTCGTTTCGACCGTCT |

\* \*\*\*\*\* \*\*\*\*\* \* \* \*\*\*\*\* \* \*\*\*\*\* \*\*\*\*\* \*\*\*\*\* \*\*

|              |                                                              |
|--------------|--------------------------------------------------------------|
| CR_left      | CGGAATCACACCGACGAAACTATTGTCCATTGCTCAGGCTATGAGGACTTGAGGCAAT   |
| Hd28_DRJ1L   | CGGAATCACACCGACGAAACTATTGTCCATTGCTCAGGCTATGAGGACTTGAGGCAAT   |
| Contig_CR-05 | CCGAATCACGCTGACGAGAACTTTCGTTTCATCGCTTAAGCTCTGAGGACTTGACGCAAT |
| Contig_CR-06 | CCGAATCACGCTGACGAGAACTTTCGTTTCATCGCTTAAGCTCTGAGGACTTGACGCAAT |
| CR_right     | CCGAATCACGCTGACGAGAACTTTCGTTTCATCGCTTAAGCTCTGAGGACTTGACGCAAT |
| Hd28_DRJ1R   | CCGAATCACGCTGACGAGAACTTTCGTTTCATCGCTTAAGCTCTGAGGACTTGACGCAAT |

\* \*\*\*\*\* \* \*\*\*\*\* \*\* \* \*\* \* \*\* \* \*\* \* \*\* \* \*\*\*\*\* \*\*\*\*\*

|              |                                                           |
|--------------|-----------------------------------------------------------|
| CR_left      | CAAGTTCGGACGCAAAAGT-----TTTGTTCGGCCATAGATCACAAGTAAGAA     |
| Hd28_DRJ1L   | CAAGTTCGGACGCAAAAGT-----TTTGTTCGGCCATAGATCACAAGTAAGAA     |
| Contig_CR-05 | CAAGTTCGGATGATAAACGCCAGACGCAAAAGTTTGTTCATAGATCACAAGTAAGAA |
| Contig_CR-06 | CAAGTTCGGATGATAAACGCCAGACGCAAAAGTTTGTTCATAGATCACAAGTAAGAA |
| CR_right     | CAAGTTCGGATGATAAACGCCAGACGCAAAAGTTTGTTCATAGATCACAAGTAAGAA |
| Hd28_DRJ1R   | CAAGTTCGGATGATAAACGCCAGACGCAAAAGTTTGTTCATAGATCACAAGTAAGAA |

\*\*\*\*\* \*\* \* \*\* \* \*\* \* \*\* \* \*\* \* \*\*\*\*\* \*\*\*\*\*

|              |                                                             |
|--------------|-------------------------------------------------------------|
| CR_left      | CAGTTCTGGACAGCTGGACAGTCCACCGATACCTCACAAGACTGTAAA-ACCTCTGGAC |
| Hd28_DRJ1L   | CAGTTCTGGACAGCTGGACAGTCCACCGATACCTCACAAGACTGTAAA-ACCTCTGGAC |
| Contig_CR-05 | CAGTTCTTACGGACCTGACAGTCCAACATTACTCTCAGACACTGTAAA-ACCTATGGAC |
| Contig_CR-06 | CAGTTCTTACGGACCTGACAGTCCAACATTACTCTCAGACACTGTAAA-ACCTATGGAC |
| CR_right     | CAGTTCTTACGGACCTGACAGTCCAACATTACTCTCAGACACTGTAAA-ACCTATGGAC |
| Hd28_DRJ1R   | CAGTTCTTACGGACCTGACAGTCCAACATTACTCTCAGACACTGTAAA-ACCTATGGAC |

\*\*\*\*\* \* \*\* \* \*\*\*\*\* \* \* \*\* \* \*\*\*\*\* \*\*\*\*\* \*\*\*\*\* \*\*\*\*\*



CR\_left GTACTGCGCACGTACCCAGTCCACGAAACACTCGTGCCACATCCATTTGATGTTGGCTT  
Hd28\_DRJ1L GTACTGCGCACGTACCCAGTCCACGAAACACTCGTGCCACATCCATTTGATGTTGGCTT  
Contig\_CR-05 GTACTTCGCACGTACCCGAGTCCACGAAACACTCGTGCTACATCCATTTGACGTTGGCCT  
Contig\_CR-06 GTACTTCGCACGTACCCGAGTCCACGAAACACTCGTGCTACATCCATTTGACGTTGGCCT  
CR\_right GTACTTCGCACGTACCCGAGTCCACGAAACACTCGTGCTACATCCATTTGACGTTGGCCT  
Hd28\_DRJ1R GTACTTCGCACGTACCCGAGTCCACGAAACACTCGTGCTACATCCATTTGACGTTGGCCT  
\*\*\*\*\*

CR\_left CTGCCAGGCATGTCGTAT--AGATTCCACGCGTGTGCCGTGTCCAGAAAAGCTTT  
Hd28\_DRJ1L CTGCCAGGCATGTCGTAT--AGATTCCACGCGTGTGCCGTGTCCAGAAAAGCTTT  
Contig\_CR-05 TCT---GACAAGGCCACTATAGAGTCCAGCGTGTGCCGTGTCCCGAAGGAGCTTT  
Contig\_CR-06 TCT---GACAAGGCCACTATAGAGTCCAGCGTGTGCCGTGTCCCGAAGGAGCTTT  
CR\_right TCT---GACAAGGCCACTATAGAGTCCAGCGTGTGCCGTGTCCCGAAGGAGCTTT  
Hd28\_DRJ1R TCT---GACAAGGCCACTATAGAGTCCAGCGTGTGCCGTGTCCCGAAGGAGCTTT  
\* \* \* \* \*

CR\_left GTTCACAACCGCGACTTTTGACTGTACCTTTGTGTTACAGTTGCGTTACGTAACACTACT  
Hd28\_DRJ1L GTTCACAACCGCGACTTTTGACTGTACCTTTGTGTTACAGTTGCGTTACGTAACACTACT  
Contig\_CR-05 T-ACTCCAACCGACTTTTTAGTGTGACCTTTGTCGTTACAGTTGCGTTACGTAACACTACT  
Contig\_CR-06 T-ACTCCAACCGACTTTTTAGTGTGACCTTTGTCGTTACAGTTGCGTTACGTAACACTACT  
CR\_right T-ACTCCAACCGACTTTTTAGTGTGACCTTTGTCGTTACAGTTGCGTTACGTAACACTACT  
Hd28\_DRJ1R T-ACTCCAACCGACTTTTTAGTGTGACCTTTGTCGTTACAGTTGCGTTACGTAACACTACT  
\* \* \* \* \*

CR\_left ACTGTGGAACCTTCTCACTGCCACAGTCAACAACAGCTATCGACAACGTGTTCTTTCAGTAT  
Hd28\_DRJ1L ACTGTGGAACCTTCTCACTGCCACAGTCAACAACAGCTATCGACAACGTGTTCTTTCAGTAT  
Contig\_CR-05 ACTGTGGAACCTTCTCACTACCACAGTTACAACAGCTTATCGGCAACAGTCCCTTCAGTAT  
Contig\_CR-06 ACTGTGGAACCTTCTCACTACCACAGTTACAACAGCTTATCGGCAACAGTCCCTTCAGTAT  
CR\_right ACTGTGGAACCTTCTCACTACCACAGTTACAACAGCTTATCGGCAACAGTCCCTTCAGTAT  
Hd28\_DRJ1R ACTGTGGAACCTTCTCACTACCACAGTTACAACAGCTTATCGGCAACAGTCCCTTCAGTAT  
\*\*\*\*\*

CR\_left CAAGAAGTCATTATGCAAGTAGAGAATGGCCGGGGTTTAAGTTGCATGAAA-GCACTCAA  
Hd28\_DRJ1L CAAGAAGTCATTATGCAAGTAGAGAATGGCCGGGGTTTAAGTTGCATGAAA-GCACTCAA  
Contig\_CR-05 CAAGAAGTAATTATCAAGTGGAGAATGGCCGGGGTTTAAGTTGCATGAAA-GCACTCAA  
Contig\_CR-06 CAAGAAGTAATTATCAAGTGGAGAATGGCCGGGGTCGG-AGTTGCATGAAA-GCACTCAA  
CR\_right CAAGAAGTAATTATCAAGTGGAGAATGGCCGGGGTCGG-AGTTGCATGAAAAGCACGGAA  
Hd28\_DRJ1R CAAGAAGTAATTATCAAGTGGAGAATGGCCGGGGTCGG-AGTTGCATGAAAAGCACGGAA  
\*\*\*\*\*

CR\_left TTGTCTACAATGCAGACGAG  
Hd28\_DRJ1L TTGTCTACAATGCAGACGAG  
Contig\_CR-05 TTGTCTACAATGCAGACGAG  
Contig\_CR-06 TTGTCTACAATGCAGACGAG  
CR\_right GTGTGTACAATACAGACGGG  
Hd28\_DRJ1R GTGTGTACAATACAGACGGG  
\* \* \* \* \*
