# Supplementary material for: Genomic architecture of endogenous ichnoviruses reveals distinct evolutionary pathways leading to virus domestication in parasitic wasps
Source: PubMed Central journal article supplement (PMC7379367; doi:10.1186/s12915-020-00822-3), 2020-07-24
Supplement: 12915_2020_822_MOESM14_ESM.pdf [file 12915_2020_822_MOESM14_ESM.pdf]

**Additional file 14.** Characteristics of the libraries used for genome assembly.

**Table S14.** *Campoletis sonorensis* genome

|             | Library ID | Insert size (bp) | Read length (bp) | Data (Gb) | Sequence depth (X) |
|-------------|------------|------------------|------------------|-----------|--------------------|
| Paired-ends | CS_WGS_001 | 250              | 150              | 19.18     | 74.05              |

**Table S15.** *Hyposoter didymator* genome

|             | Insert size (bp) | Read length (bp) | Data (Gb) | Sequence depth (X) | Experiment ID (NCBI SRA) |
|-------------|------------------|------------------|-----------|--------------------|--------------------------|
| Paired-ends | 250              | 135_145          | 6.96      | 19.89              | SRX7136286               |
|             | 500              | 100_110          | 1.52      | 4.33               | SRX7136287               |
|             | 800              | 100              | 3.01      | 8.60               | SRX7136288               |
| Mate-pairs  | 2,000            | 100              | 7.93      | 22.66              | SRX7136289               |
|             | 5,000            | 100              | 5.20      | 14.85              | SRX7136290               |
